# Supplementary material for: A HIF–LIMD1 negative feedback mechanism mitigates the pro‐tumorigenic effects of hypoxia
Source: PubMed Central journal article supplement (PMC6079541; doi:10.15252/emmm.201708304), 2018-06-21
Supplement: EMMM-10-e8304-s001.pdf [file EMMM-10-e8304-s001.pdf]

# Appendix

## **A HIF-LIMD1 negative feedback mechanism drives the adaptive response to hypoxia and mitigates pro-tumorigenic hypoxic effects**

Daniel E. Foxler<sup>1†</sup>, Katherine S. Bridge<sup>1†</sup>, John G. Foster<sup>1</sup>, Paul Grevitt<sup>1</sup>, Sean Curry<sup>2</sup>, Kunal M. Shah<sup>1</sup>, Kathryn M. Davidson<sup>1</sup>, Ai Nagano<sup>1</sup>, Emanuela Gadaleta<sup>1</sup>, Hefin I. Rhys<sup>3</sup>, Paul T. Kennedy<sup>1</sup>, Miguel A. Hermida<sup>1</sup>, Ting-Yu Chang<sup>4</sup>, Peter E. Shaw<sup>2</sup>, Louise E. Reynolds<sup>5</sup>, Tristan R. McKay<sup>6</sup>, Hsei-Wei Wang<sup>4</sup>, Paulo S. Ribeiro<sup>5</sup>, Michael J. Plevin<sup>7</sup>, Dimitris Lagos<sup>8</sup>, Nicholas R. Lemoine<sup>1</sup>, Prabhakar Rajan<sup>1</sup>, Trevor A. Graham<sup>5</sup>, Claude Chelala<sup>1</sup>, Kairbaan M. Hodivala-Dilke<sup>5</sup>, Ian Spendlove<sup>2</sup>  
and Tyson V. Sharp<sup>1\*</sup>

1. Centre for Molecular Oncology, Barts Cancer Institute, Queen Mary University of London, UK

2. Faculty of Medicine and Life Sciences, University of Nottingham, UK

3. The Francis Crick Institute, London, UK

4. Institute of Microbiology and Immunology, National Yang Ming University, Taiwan

5. Centre for Tumour Biology, Barts Cancer Institute, Queen Mary University of London, UK

6. School of Healthcare Science, Manchester Metropolitan University, UK

7. Department of Biology, University of York, Heslington, York YO10 5DD, UK

8. Centre for Immunology and Infection, Hull York Medical School and Department of Biology, University of York, Heslington, York YO10 5DD, UK

\* Corresponding author [t.sharp@gmul.ac.uk](mailto:t.sharp@gmul.ac.uk)

† These authors contributed equally to this work

### **Table of Contents**

Appendix Figures S1-S3

Appendix Figure Legends

Appendix Materials and Methods

Appendix Tables S1-S11

**Figure S1.**

| Variable                        | LIMD1 frequency |            |         | VEGF frequency |             |         | HIF1a frequency |            |         |
|---------------------------------|-----------------|------------|---------|----------------|-------------|---------|-----------------|------------|---------|
|                                 | Low             | High       | P value | Low            | High        | P value | Low             | High       | P value |
| <b>Age</b>                      |                 |            |         |                |             |         |                 |            |         |
| <70                             | 55 (28.9%)      | 37 (19.5%) | 0.056   | 14 (7.0%)      | 81 (40.7%)  | 0.051   | 78 (40.2%)      | 15 (7.7%)  | 0.317   |
| >70                             | 45 (23.7%)      | 53 (27.9%) |         | 27 (13.6%)     | 77 (38.7%)  |         | 79 (40.7%)      | 22 (11.3%) |         |
| <b>Sex</b>                      |                 |            |         |                |             |         |                 |            |         |
| Male                            | 48 (24.6%)      | 45 (23.1%) | 0.747   | 20 (9.9%)      | 76 (37.4%)  | 0.831   | 81 (40.9%)      | 16 (8.1%)  | 0.438   |
| Female                          | 55 (28.2%)      | 47 (24.1%) |         | 21 (10.3%)     | 86 (42.4%)  |         | 80 (40.4%)      | 21 (10.6%) |         |
| <b>Smoker</b>                   |                 |            |         |                |             |         |                 |            |         |
| Yes                             | 41 (21.4%)      | 35 (18.2%) | 0.392   | 21 (10.4%)     | 63 (31.3%)  | 0.323   | 61 (31.1%)      | 20 (10.2%) | 0.215   |
| Ex                              | 46 (24.0%)      | 47 (24.5%) |         | 15 (7.5%)      | 79 (39.3%)  |         | 79 (40.3%)      | 14 (7.1%)  |         |
| Unknown                         | 15 (7.8%)       | 8 (4.2%)   |         | 5 (2.5%)       | 18 (9.0%)   |         | 19 (9.7%)       | 3 (1.5%)   |         |
| <b>Post – Op Histopathology</b> |                 |            |         |                |             |         |                 |            |         |
| Adenocarcinoma                  | 94 (47.2%)      | 83 (41.7%) | 0.846   | 35 (15.6%)     | 143 (63.8%) | 0.625   | 143 (65%)       | 30 (13.6%) | 0.178   |
| Adenosquamous Carcinoma         | 8 (4.0%)        | 9 (4.5%)   |         | 6 (2.7%)       | 18 (8.0%)   |         | 17 (7.7%)       | 7 (3.2%)   |         |
| Other                           | 3 (1.5%)        | 2 (1.0%)   |         | 3 (1.3%)       | 19 (8.5%)   |         | 21 (9.5%)       | 2 (0.9%)   |         |
| <b>Differentiation</b>          |                 |            |         |                |             |         |                 |            |         |
| Well                            | 8 (4.3%)        | 14 (7.5%)  | 0.84    | 7 (3.6%)       | 18 (9.2%)   | 0.492   | 19 (10.0%)      | 4 (2.1%)   | 0.826   |
| Moderate                        | 35 (18.7%)      | 40 (21.4%) |         | 15 (7.7%)      | 62 (32.8%)  |         | 61 (32.1%)      | 12 (6.3%)  |         |
| Poor                            | 33 (17.6%)      | 24 (12.8%) |         | 8 (4.1%)       | 49 (25.1%)  |         | 45 (23.7%)      | 13 (6.8%)  |         |
| Unknown                         | 22 (11.8%)      | 11 (5.9%)  |         | 8 (4.1%)       | 28 (14.4%)  |         | 30 (15.8%)      | 6 (3.2%)   |         |
| <b>Tumour Size</b>              |                 |            |         |                |             |         |                 |            |         |
| T1a + T1b                       | 22 (11.3%)      | 30 (15.5%) | 0.22    | 17 (8.4%)      | 38 (18.8%)  | 0.07    | 39 (19.8%)      | 13 (6.6%)  | 0.388   |
| T2a + T2b                       | 52 (26.8%)      | 41 (21.1%) |         | 15 (7.4%)      | 80 (39.6%)  |         | 80 (40.6%)      | 15 (7.6%)  |         |
| T3 + T4                         | 28 (14.4%)      | 21 (10.8%) |         | 9 (4.5%)       | 43 (21.3%)  |         | 41 (20.8%)      | 9 (4.6%)   |         |
| <b>Node Involvement</b>         |                 |            |         |                |             |         |                 |            |         |
| 0                               | 56 (29.2%)      | 56 (29.2%) | 0.606   | 30 (15.0%)     | 88 (44.0%)  | 0.114   | 91 (46.7%)      | 22 (11.3%) | 0.979   |
| 1                               | 27 (14.1%)      | 23 (12.0%) |         | 7 (3.5%)       | 42 (21.0%)  |         | 40 (20.5%)      | 9 (4.6%)   |         |
| 2                               | 18 (9.4%)       | 12 (6.3%)  |         | 4 (2.0%)       | 29 (14.5%)  |         | 27 (13.8%)      | 6 (3.1%)   |         |
| <b>Metastasis</b>               |                 |            |         |                |             |         |                 |            |         |
| Yes                             | 30 (19.6%)      | 24 (15.7%) | 0.403   | 8 (5.0%)       | 45 (28.3%)  | 0.556   | 48 (31.0%)      | 5 (3.2%)   | 0.044   |
| No                              | 48 (31.4%)      | 51 (33.3%) |         | 20 (12.6%)     | 86 (54.1%)  |         | 79 (51.0%)      | 23 (18.1%) |         |

**Figure S2.**

**A**

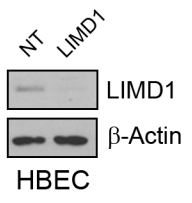

**B**

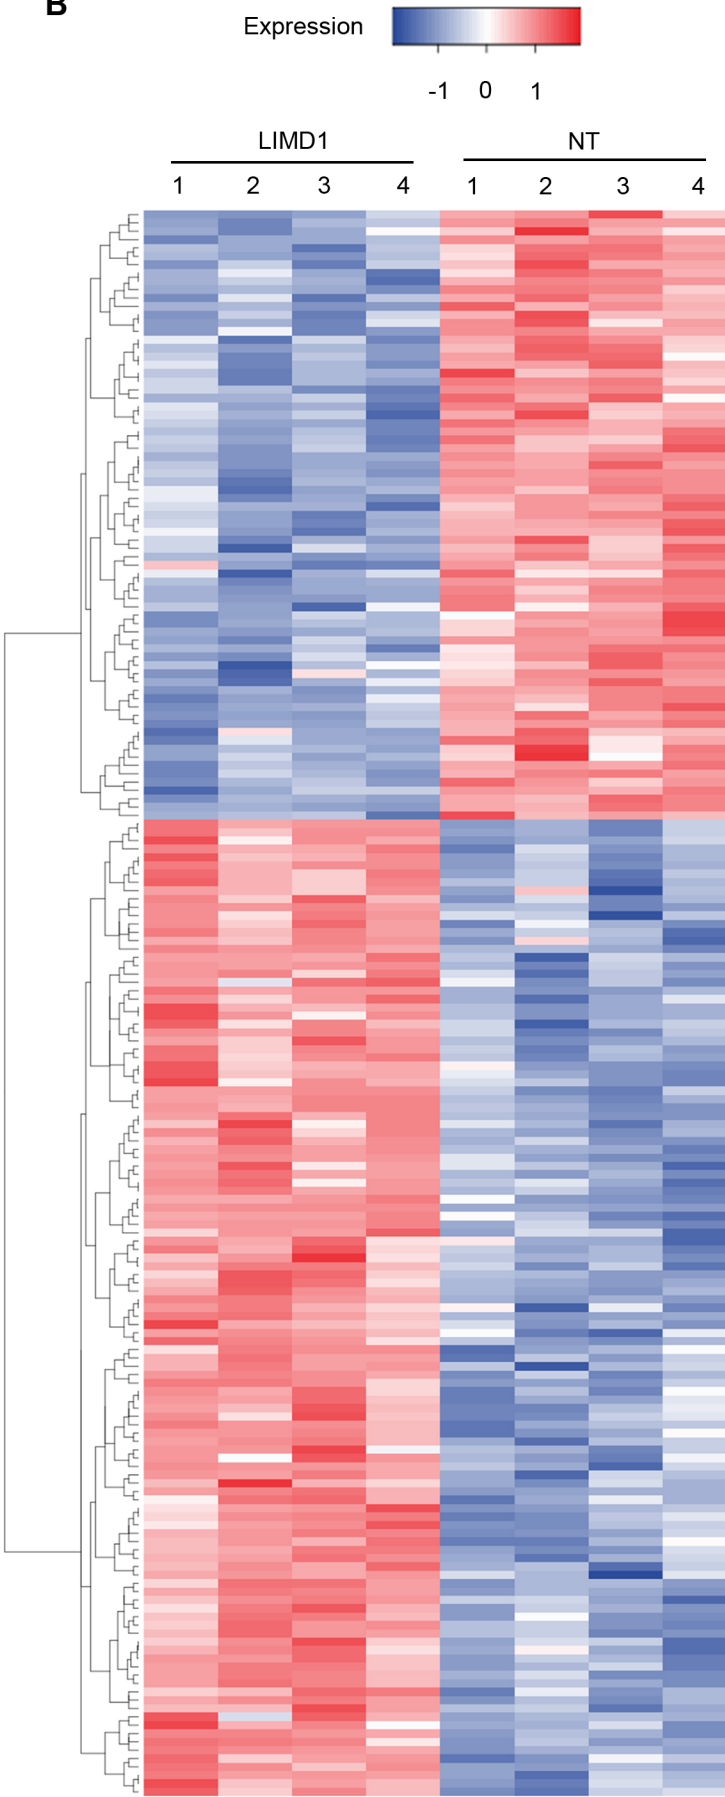

**C**

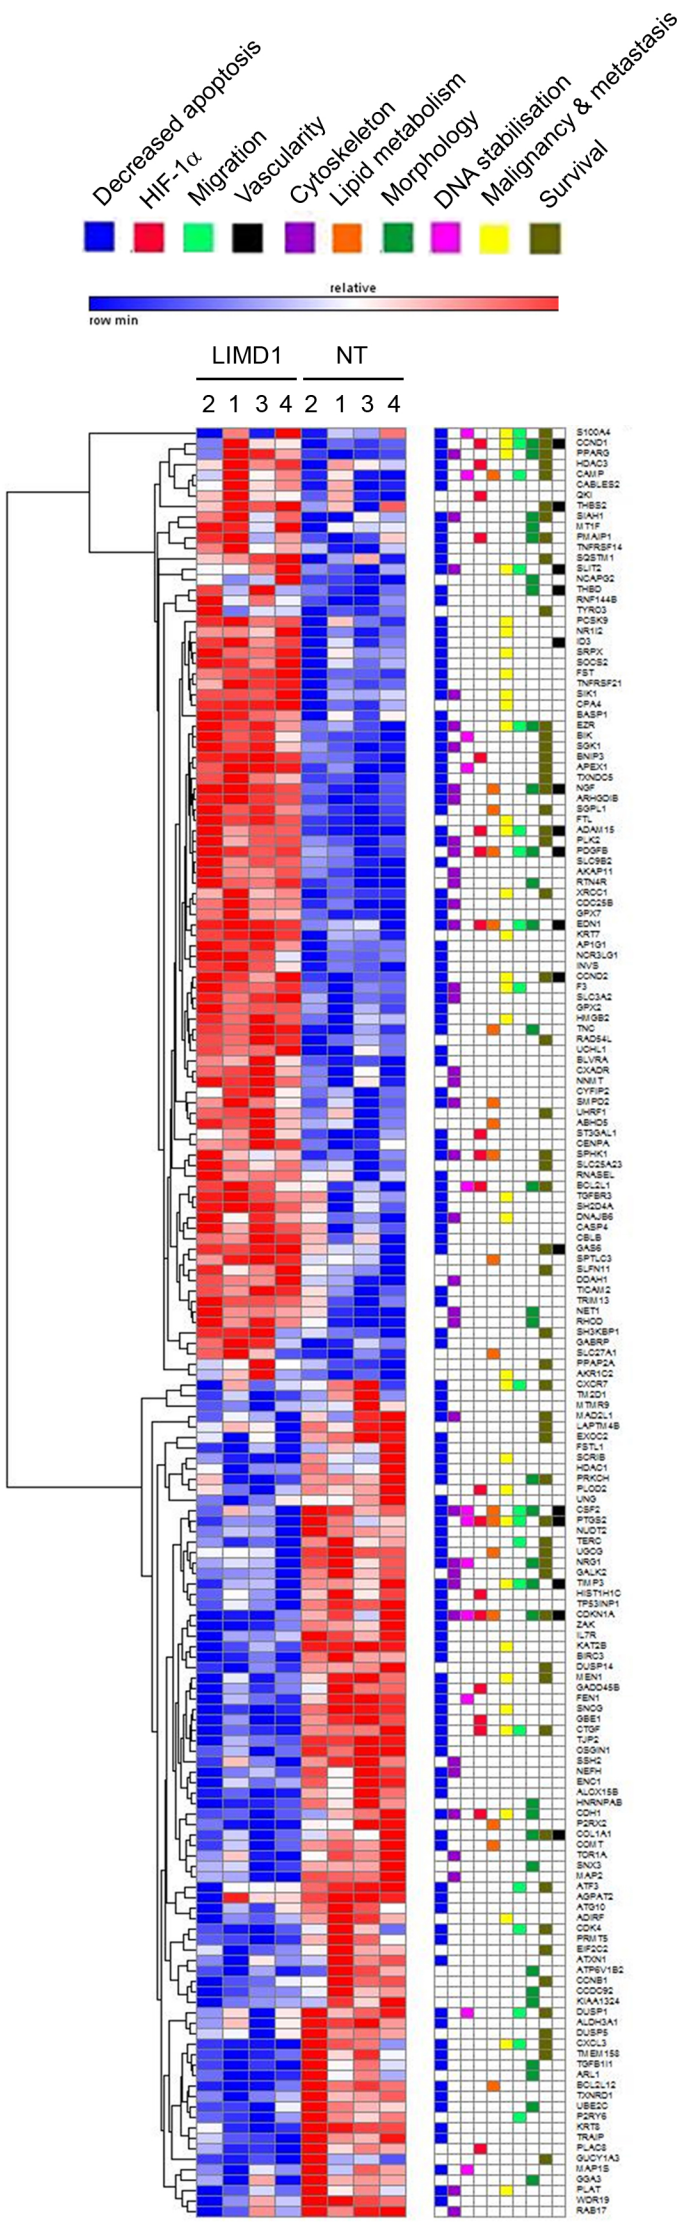

Figure S3.

| Upstream Regulator | Molecule Type           | Predicted Activation State | Activation z-score | p-value of overlap | Target molecules in dataset                                                                                                  |
|--------------------|-------------------------|----------------------------|--------------------|--------------------|------------------------------------------------------------------------------------------------------------------------------|
| HIF1A              | transcription regulator | Activated                  | 3.114              | 1.76E-04           | ADAM15,BCL2L1,BNIP3,CCND1,CDH1,CDKN1A,CTGF,EDN1,GADD45B,GBE1,HDAC3,HIST1H1C,PDGFB,PLAC8,PLOD2,PMAIP1,PTGS2,QKI,SPHK1,ST3GAL1 |

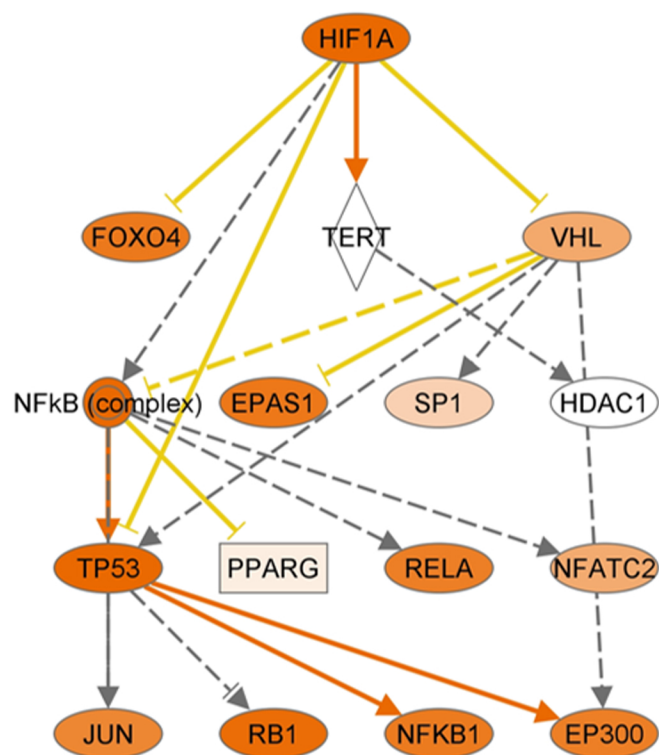

## Appendix Figure Legends

### Appendix Figure S1

Clinicopathological analysis of LIMD1, VEGF and HIF-1 $\alpha$  expressions from analysis of 276 TMA cores from data as described for Fig. 6.

### Appendix Figure S2

**(A)** LIMD1 protein is depleted following siRNA (80nM) treatment of primary human bronchial epithelial (HBEC) cells. Western blot analysis of HBEC cells transfected with 80nm non-targeting (NT) or LIMD1-targeting siRNA for 72 hours.

**(B)** Heat map analysis of total gene changes following siRNA-mediated depletion of *LIMD1* from HBEC cells. RNA was extracted from NT or LIMD1 siRNA transfected cells as described in (A) and gene expression was quantified by HT12v4.0 Illumina microarray. Heat map displayed is from analysis from 4 technical replicates.

**(C)** Heat map analysis showing the top 10 altered pathways in primary HBECs following *LIMD1* depletion. Microarray analysed gene expression changes with a q value cut off of <0.15 were interrogated with Ingenuity Pathway Analysis (IPA) software. Gene ontology changes was collected from the Bio Functions read out of IPA results where activation was >+1 or <-1 and categories were collapsed into similar overall functions.

### Appendix Figure S3

Identification of HIF-1 $\alpha$  regulated ontology gene changes as identified by Ingenuity Pathway Analysis.

# Appendix Materials and Methods

## Statistical analysis

### Figure 1

- **Figure 1A:**

Data were normalised to each cell line's 0 time point, one-sample t tests were used comparing each mean against the theoretical value of 1.

- **Figure 1C:**

Data were normalised to each cell line's 0 time point, one-sample t tests were used comparing each mean against the theoretical value of 1. These  $p$  values had a Holm-Sidak correction applied to them to control the familywise error rate.

- **Figure 1E:**

Data were normalised to the normoxia groups (0hr), a mixed model ANOVA was performed, allowing for the effect of time to vary between each experiment/replicate. There was a significant effect of Time ( $p = 0.005$ ), Genotype ( $p < 0.001$ ), and an interaction between them ( $p = 0.018$ ).

### Figure 2

- **Figure 2C:**

Data were normalised to the non-targeting (NT) treatment within each oxygen condition (normoxia and hypoxia), other siRNA treatments were compared to NT baseline with one-sample t tests, comparing each mean against the theoretical value of 1. These  $p$  values had a Holm-Sidak correction applied to them to control the familywise error rate.

### Figure 3

- **Figure 3I:**

Data were normalised to the mean of the 0 hour WT group and analysed using a mixed model ANOVA, where Time and Genotype were entered as fixed factors, and the effect of time was allowed to vary between experimental runs. The model residuals approximated a normal distribution. There was a significant main effect of Genotype ( $p = 0.004$ ), no main effect of Time ( $p = 0.113$ ) but a significant interaction between them ( $p = 0.002$ ) as the difference between the genotypes increases over time. Holm-Sidak post hoc tests of WT vs MT at each level of time demonstrated significance at time 24 hour ( $p < 0.001$ ).

- **Figure 3J:**

Data were analysed with a 2-way ANOVA where Genotype and Gene were entered as independent variables. There was a significant effect of Genotype, Gene and interaction between them (all  $p < 0.001$ ) as the effect of Genotype was not the same for all genes. The model residuals are approximately normally distributed. Holm-Sidak post-hoc tests comparing WT vs MT at each level of Gene demonstrated significant differences for all comparisons.

- **Figure 3K:**

Data were analysed using a mixed model ANOVA, where Time and Genotype were entered as fixed factors, and the effect of time was allowed to vary between experimental runs. The model residuals approximated a normal distribution. There was a significant main effect of Genotype ( $p = 0.012$ ), a significant main effect of Time ( $p < 0.001$ ) and a significant interaction between them ( $p = 0.044$ ) as the difference between the genotypes increases over time. Holm-Sidak post hoc tests of WT vs MT at each level of time demonstrated one significant difference, which was at time 48 hours.

## Figure 4

- **Figure 4B:**

Densitometry values for HIF-1 $\alpha$  protein normalised to  $\beta$ -actin densitometry were compared between 0-30 minutes, and change in densitometry per minute was calculated as rate of decay (ROD) for each genotype (WT/MUT). One-sample t tests were used comparing mean ROD.

- **Figure 4D:**

Data were normalised to the mean of the normoxic WT group. The data were analysed using a mixed model ANOVA, where Time, Genotype and siRNA treatment were entered as fixed factors, and the effect of time was allowed to vary between experimental runs. The model residuals approximated a normal distribution. All three main effects and all four interactions were significant. Holm-Sidak post hoc tests comparing each level of siRNA treatment against every other level, at each combination of Time and Genotype demonstrated only two significant differences: NT vs HIF1a and NT vs HIF2a at Time 48 and MT Genotype only (both  $p < 0.001$ ).

## Figure 5

- **Figure 5A:**

Data were analysed using a mixed model ANOVA, where Time and Genotype were entered as fixed factors, and the effect of time was allowed to vary between experimental runs. The model residuals approximated a normal distribution. There was a significant main effect of Genotype, Time, and interaction between them (all  $p < 0.001$ ). Holm-Sidak post hoc tests of WT vs MT at each level of time demonstrated significant differences at each level (all  $p < 0.001$ ).

- **Figure 5B:**

Data were analysed with a 2-way ANOVA where Genotype and Gene were entered as independent variables. There was a significant effect of Genotype, Gene and interaction



between them (all  $p < 0.001$ ) as the effect of Genotype was not the same for all genes. The model residuals are approximately normally distributed. Holm-Sidak post-hoc tests comparing WT vs MT at each level of Gene demonstrated significant differences for VEGF and ALDOC (both  $p < 0.001$ ) only.

- **Figure 5C:**

Data were analysed using a mixed model ANOVA, where Hypoxia and Genotype were entered as fixed factors, and the effect of hypoxia was allowed to vary between experimental runs. The model residuals approximated a normal distribution. There was a significant main effect of genotype ( $p = 0.025$ ) but no main effect of Hypoxia or an interaction. As a result of this, no *post hoc* tests were required, and so the  $p$  value of the main effect of genotype is sufficient.

- **Figure 5D:**

One mouse in the WT group with an unusually large tumour volume for its group. Data are analysed with a Mann-Whitney U test which gave a  $p$  value of 0.005.

- **Figure 5F:**

Data were analysed with a Welch's t test which gave a  $p$  value of  $< 0.001$  (residuals were approximately normally distributed).

- **Figure 5G-J:**

Distribution of the genotype groups was skewed and the residuals were non-normal, and the groups displayed heterogenous variance, these data were therefore analysed using Welch-corrected t tests applied to log<sub>10</sub>-transformed data. A linear discriminant analysis was also performed, which is similar to principal components analysis, but finds the linear combination of the log<sub>10</sub> expression data which best discriminates the groups. The two groups are completely separated by the single discriminant factor, and the factor loadings

(the correlation of the log<sub>10</sub> expression values with the discriminant factor). This shows in a single analysis how the expression values vary across the two groups.

## Expanded view Figures

### Figure EV1

- **Figure EV1B**

Densitometric analysis of LIMD1 protein normalized to  $\beta$ -actin were normalised to each cell line's 0 time point, one-sample t tests were used comparing each mean against the theoretical value of 1.

- **Figure EV1C-D**

Values for the Time = 0 group of each cell line were equal to 1, therefore the data was analysed with a separate one-sample t test per bar (against the theoretical value of 1) and a Holm-Sidak correction was applied.

- **Figure EV1J**

Data were normalised to vector only (VO) reporter plasmid, and one-sample t tests were used comparing each mean against the theoretical value of 1.

### Figure EV2

- **Figure EV2E-I**

Data were normalised to the non-targeting (NT) treatment within each oxygen condition (normoxia and hypoxia), other siRNA treatments were compared to NT baseline with one-sample t tests, comparing each mean against the theoretical value of 1. These *p* values had a Holm-Sidak correction applied to them to control the familywise error rate.

### Figure EV3

- **Figure EV3B-E**

Data were analysed using a mixed model ANOVA where Time and Genotype were entered as fixed factors, and the effect of time was allowed to vary between experimental runs. The residuals from both models approximated a normal distribution.  $p$  values had a Holm-Sidak correction applied to them to control the familywise error rate.

- **Figure EV3F**

Data were analysed using a 2-way ANOVA, entering Time and Genotype as factors. Both main effects and the interaction were significant (all  $p < 0.001$ ). The model residuals approximated a normal distribution.

- **Figure EV3G**

Data were analysed with a 2-way ANOVA where Genotype and Time were entered as independent variables. There was a significant effect of Genotype, Time and interaction between them (all  $p < 0.001$ ) as the effect of Genotype was not the same for all levels of Time. The model residuals are approximately normally distributed. Holm-Sidak post-hoc tests compared WT vs MT at each level of Time.

- **Figure EV3H**

Data were analysed with one-sample t tests, comparing the mean of the MT data at each level of Gene against the theoretical value of 1.  $p$  values then had a Holm-Sidak correction applied to them. The MT data were significantly different from 1 for the ALDOC ( $p = 0.042$ ) and ERO1L ( $p = 0.011$ ) genes, and the HK1 gene was just shy of significance ( $p = 0.064$ ).

- **Figure EV3I**

Data were analysed with a separate one-sample t test per gene (against the theoretical value of 1) and applied a Holm-Sidak correction. The only significant difference was for the HK1 gene ( $p = 0.031$ ).

- **Figure EV3J**

Data were analysed with a 2-way ANOVA where Genotype and Gene were entered as independent variables. There was a significant effect of Genotype, Gene and interaction between them (all  $p < 0.001$ ) as the effect of Genotype was not the same for all levels of Gene. The model residuals are approximately normally distributed. Holm-Sidak post-hoc tests comparing WT vs MT at each level of Gene demonstrated significant differences for VEGF ( $p < 0.001$ ), BNIP3 ( $p = 0.074$ , almost significant), ALDOC ( $p = 0.012$ ), and HK1 ( $p < 0.001$ ).

- **Figure EV3K**

A mixed model ANOVA was applied where Genotype and Gene were entered as independent variables, allowing for a separate intercept for each experimental run. The model residuals were highly heteroscedastic, so a second model was created where the dependent variable was log<sub>10</sub> transformed, however the residuals were still heteroscedastic and non-normally distributed. Therefore separate Mann-Whitney U tests were performed, comparing WT and MT at each level of Gene, however there were no significant differences.

- **Figure EV3L**

Data were analysed using a mixed model ANOVA, where Time and Genotype were entered as fixed factors, and the effect of time was allowed to vary between experimental runs. The model residuals approximated a normal distribution. There were no significant main effects or interactions.

## **Figure EV4**

- **Figure EV4C-O:**

Distribution of the genotype groups was skewed and the residuals were non-normal, and the groups displayed heterogenous variance, these data were therefore analysed using Welch-corrected t tests applied to log<sub>10</sub>-transformed data. A linear discriminant analysis was also performed, which is similar to principal components analysis, but finds the linear combination of the log<sub>10</sub> expression data which best discriminates the groups. The two groups are completely separated by the single discriminant factor, and the factor loadings (the correlation of the log<sub>10</sub> expression values with the discriminant factor). This shows in a single analysis how the expression values vary across the two groups.

**Table S1: Statistical analysis corresponding to Figure 1**

| <b>Figure 1A: LIMD1 mRNA</b> |                  |          |             |            |   | <b>Test Results</b> |                |
|------------------------------|------------------|----------|-------------|------------|---|---------------------|----------------|
| <b>Cell line</b>             | <b>1% O2 (h)</b> | <b>N</b> | <b>Mean</b> | <b>SEM</b> |   | <b>Comparison</b>   | <b>P value</b> |
| A549                         | 0                | 3        |             | 1          | 0 | A549 0h vs. 48h     | 0.00068        |
|                              | 4                | 3        | 1.730201    | 0.050168   |   | HeLa 0h vs. 48h     | 5.5E-05        |
|                              | 24               | 3        | 1.911079    | 0.169063   |   | HEK293 0h vs. 48h   | 1.46E-06       |
|                              | 48               | 3        | 1.642051    | 0.276446   |   | U2OS 0h vs. 48h     | 0.000134       |
| HeLa                         | 0                | 3        |             | 1          | 0 | SAEC 0h vs. 48h     | 0.042335       |
|                              | 4                | 3        | 2.81952     | 0.151835   |   | HDF 0h vs. 48h      | 0.039845       |
|                              | 24               | 3        | 3.577857    | 0.461736   |   |                     |                |
|                              | 48               | 3        | 3.378797    | 0.553669   |   |                     |                |
| HEK293                       | 0                | 3        |             | 1          | 0 |                     |                |
|                              | 4                | 3        | 2.963837    | 0.435978   |   |                     |                |
|                              | 24               | 3        | 3.753285    | 0.243858   |   |                     |                |
|                              | 48               | 3        | 3.487724    | 0.24913    |   |                     |                |
| U2OS                         | 0                | 3        |             | 1          | 0 |                     |                |
|                              | 4                | 3        | 2.670475    | 0.072294   |   |                     |                |
|                              | 24               | 3        | 2.095063    | 0.113342   |   |                     |                |
|                              | 48               | 3        | 2.041784    | 0.045367   |   |                     |                |
| SAEC                         | 0                | 3        |             | 1          | 0 |                     |                |
|                              | 4                | 3        | 1.144392    | 0.151512   |   |                     |                |
|                              | 24               | 3        | 1.588118    | 0.150357   |   |                     |                |
|                              | 48               | 3        | 1.560516    | 0.217055   |   |                     |                |
| HDF                          | 0                | 3        |             | 1          | 0 |                     |                |
|                              | 4                | 3        | 0.891052    | 0.086315   |   |                     |                |
|                              | 24               | 3        | 1.148354    | 0.081511   |   |                     |                |
|                              | 48               | 3        | 1.610363    | 0.236962   |   |                     |                |

| <b>Figure 1C: LIMD1 protein densitometry</b> |                  |          |             |            |   | <b>Test Results</b> |                |
|----------------------------------------------|------------------|----------|-------------|------------|---|---------------------|----------------|
| <b>Cell line</b>                             | <b>1% O2 (h)</b> | <b>N</b> | <b>Mean</b> | <b>SEM</b> |   | <b>Comparison</b>   | <b>P value</b> |
| A549                                         | 0                | 3        |             | 1          | 0 | A549 0h vs. 24h     | 0.033          |
|                                              | 4                | 3        | 1.681685    | 0.200125   |   | HEK293 0h vs. 24h   | 0.048          |
|                                              | 24               | 3        | 2.77541     | 0.199524   |   | HeLa 0h vs. 24h     | n.s.           |
| HEK293                                       | 0                | 3        |             | 1          | 0 | U2OS 0h vs. 24h     | n.s.           |
|                                              | 4                | 3        | 2.049408    | 0.142132   |   |                     |                |
|                                              | 24               | 3        | 3.020126    | 0.319687   |   |                     |                |
| HeLa                                         | 0                | 3        |             | 1          | 0 |                     |                |
|                                              | 4                | 3        | 0.871981    | 0.12675    |   |                     |                |
|                                              | 24               | 3        | 1.940787    | 0.293154   |   |                     |                |
| U2OS                                         | 0                | 3        |             | 1          | 0 |                     |                |
|                                              | 4                | 3        | 0.807274    | 0.13855    |   |                     |                |
|                                              | 24               | 3        | 1.739663    | 0.21056    |   |                     |                |

| <b>Figure 1E: Renilla Luciferase/Firefly luciferase activity</b> |                  |          |             |            |          | <b>Test Results</b>      |                |
|------------------------------------------------------------------|------------------|----------|-------------|------------|----------|--------------------------|----------------|
| <b>Reporter construct</b>                                        | <b>1% O2 (h)</b> | <b>N</b> | <b>Mean</b> | <b>SEM</b> |          | <b>Comparison</b>        | <b>P value</b> |
| VO                                                               | 0                |          |             | 1          | 0.156446 | VO 0h vs. 48h            | n.s.           |
|                                                                  | 4                |          | 1.000056    | 0.084771   |          | WT 0h vs. 48h            | < 0.001        |
|                                                                  | 24               |          | 1.000058    | 0.336296   |          | $\Delta$ HRE1 0h vs. 48h | < 0.001        |
|                                                                  | 48               |          | 1.000107    | 0.147003   |          | $\Delta$ HRE2 0h vs. 48h | < 0.001        |
| WT LIMD1 promoter                                                | 0                |          |             | 1          | 0.013527 | $\Delta$ HRE3 0h vs. 48h | 0.063          |
|                                                                  | 4                |          | 1.990126    | 0.230431   |          |                          |                |
|                                                                  | 24               |          | 3.725871    | 0.231057   |          |                          |                |
|                                                                  | 48               |          | 3.481573    | 0.342414   |          |                          |                |
| $\Delta$ HRE1                                                    | 0                |          |             | 1          | 0.196142 |                          |                |
|                                                                  | 4                |          | 1.814047    | 0.227388   |          |                          |                |
|                                                                  | 24               |          | 2.818145    | 0.580573   |          |                          |                |
|                                                                  | 48               |          | 3.635332    | 0.148128   |          |                          |                |
| $\Delta$ HRE2                                                    | 0                |          |             | 1          | 0.18462  |                          |                |
|                                                                  | 4                |          | 1.597805    | 0.20117    |          |                          |                |
|                                                                  | 24               |          | 2.524697    | 0.402358   |          |                          |                |
|                                                                  | 48               |          | 3.477972    | 0.679774   |          |                          |                |
| $\Delta$ HRE3                                                    | 0                |          |             | 1          | 0.229593 |                          |                |
|                                                                  | 4                |          | 1.192254    | 0.06808    |          |                          |                |
|                                                                  | 24               |          | 0.838765    | 0.196243   |          |                          |                |
|                                                                  | 48               |          | 1.492902    | 0.304928   |          |                          |                |

**Table S2: Statistical analysis corresponding to Figure 2**

| <b>Figure 2C: LIMD1 mRNA</b> |                |   |          |          |                                         |         |  |
|------------------------------|----------------|---|----------|----------|-----------------------------------------|---------|--|
| % O <sub>2</sub>             | siRNA          | N | Mean     | SEM      | Test Results                            |         |  |
|                              |                |   |          |          | Comparison                              | P value |  |
| 20                           | NT             | 3 | 1        |          |                                         |         |  |
|                              | LIMD1          | 3 | 0.5287   | 0.12503  | 20% O <sub>2</sub> NT vs LIMD1          | 0.058   |  |
|                              | PHD2           | 3 | 1.61426  | 0.08549  | 20% O <sub>2</sub> NT vs PHD2           | n.s.    |  |
|                              | HIF-1 $\alpha$ | 3 | 0.8364   | 0.10562  | 20% O <sub>2</sub> NT vs HIF-1 $\alpha$ | n.s.    |  |
|                              | HIF-2 $\alpha$ | 3 | 2.32282  | 0.03692  | 20% O <sub>2</sub> NT vs HIF-2 $\alpha$ | 0.098   |  |
| 1                            | NT             | 3 | 1        |          |                                         |         |  |
|                              | LIMD1          | 3 | 0.44967  | 0.004637 | 1% O <sub>2</sub> NT vs LIMD1           | 0.061   |  |
|                              | PHD2           | 3 | 1.789165 | 0.056872 | 1% O <sub>2</sub> NT vs PHD2            | 0.05    |  |
|                              | HIF-1 $\alpha$ | 3 | 0.58448  | 0.026847 | 1% O <sub>2</sub> NT vs HIF-1 $\alpha$  | 0.004   |  |
|                              | HIF-2 $\alpha$ | 3 | 1.761148 | 0.204836 | 1% O <sub>2</sub> NT vs HIF-2 $\alpha$  | 0.098   |  |

**Table S3: Statistical analysis corresponding to Figure 3**

| <b>Figure 3I: HIF-1 reporter activity (Renilla Luciferase/Firefly Luciferase)</b> |                         |   |          |          |                   |         |  |
|-----------------------------------------------------------------------------------|-------------------------|---|----------|----------|-------------------|---------|--|
| 1% O <sub>2</sub> (h)                                                             | LIMD1 promoter genotype | N | Mean     | SEM      | Test Results      |         |  |
|                                                                                   |                         |   |          |          | Comparison        | P value |  |
| 0                                                                                 | HRE WT                  | 3 | 1        | 0.32239  |                   |         |  |
|                                                                                   | HRE MUT                 | 3 | 0.874243 | 0.202266 | 0h HRE WT vs MUT  | n.s.    |  |
| 4                                                                                 | HRE WT                  | 3 | 9.825007 | 0.708228 |                   |         |  |
|                                                                                   | HRE MUT                 | 3 | 10.31575 | 0.854213 | 4h HRE WT vs MUT  | n.s.    |  |
| 24                                                                                | HRE WT                  | 3 | 107.3597 | 11.31404 |                   |         |  |
|                                                                                   | HRE MUT                 | 3 | 156.8058 | 10.21354 | 24h HRE WT vs MUT | < 0.001 |  |

| <b>Figure 3J: HIF-1 target gene expression (mRNA)</b> |                         |   |          |          |                     |         |  |
|-------------------------------------------------------|-------------------------|---|----------|----------|---------------------|---------|--|
| HIF-1 target gene                                     | LIMD1 promoter genotype | N | Mean     | SEM      | Test Results        |         |  |
|                                                       |                         |   |          |          | Comparison          | P value |  |
| VEGF                                                  | HRE WT                  | 3 | 0.834597 | 0.141065 |                     |         |  |
|                                                       | HRE MUT                 | 3 | 1.445817 | 0.015346 | VEGF HRE WT vs MUT  | 0.015   |  |
| BNIP3                                                 | HRE WT                  | 3 | 2.567184 | 0.121167 |                     |         |  |
|                                                       | HRE MUT                 | 3 | 3.486082 | 0.455913 | BNIP3 HRE WT vs MUT | 0.001   |  |
| ALDOC                                                 | HRE WT                  | 3 | 6.233116 | 0.183827 |                     |         |  |
|                                                       | HRE MUT                 | 3 | 10.65871 | 1.876565 | ALDOC HRE WT vs MUT | < 0.001 |  |
| ERO1L                                                 | HRE WT                  | 3 | 1.695276 | 0.078749 |                     |         |  |
|                                                       | HRE MUT                 | 3 | 3.15249  | 0.292563 | ERO1L HRE WT vs MUT | < 0.001 |  |
| HK1                                                   | HRE WT                  | 3 | 1.865569 | 0.062777 |                     |         |  |
|                                                       | HRE MUT                 | 3 | 5.074891 | 0.737543 | HK1 HRE WT vs MUT   | < 0.001 |  |

| <b>Figure 3K: Secreted VEGF-A</b> |                         |   |          |          |                   |         |  |
|-----------------------------------|-------------------------|---|----------|----------|-------------------|---------|--|
| 1% O <sub>2</sub> (h)             | LIMD1 promoter genotype | N | Mean     | SEM      | Test Results      |         |  |
|                                   |                         |   |          |          | Comparison        | P value |  |
| 0                                 | HRE WT                  | 3 | 1011.376 | 4.504147 |                   |         |  |
|                                   | HRE MUT                 | 3 | 1057.897 | 2.951266 | 0h HRE WT vs MUT  |         |  |
| 48                                | HRE WT                  | 3 | 1226.531 | 60.04585 |                   |         |  |
|                                   | HRE MUT                 | 3 | 1525.245 | 51.65455 | 48h HRE WT vs MUT |         |  |

**Table S4: Statistical analysis corresponding to Figure 4**

| <b>Figure 4B: HIF-1<math>\alpha</math> protein rate of decay (ROD)</b> |   |          |          |               |             |
|------------------------------------------------------------------------|---|----------|----------|---------------|-------------|
| LIMD1 promoter genotype                                                | N | Mean     | SEM      | Test Results  |             |
|                                                                        |   |          |          | Comparison    | P value     |
| HRE WT                                                                 | 3 | 0.029291 | 0.002569 | HRE WT vs MUT | 0.014810335 |
| HRE MUT                                                                | 3 | 0.017906 | 0.001047 |               |             |

| <b>Figure 4D: VEGF mRNA</b> |                       |                |   |       |          |                          |         |
|-----------------------------|-----------------------|----------------|---|-------|----------|--------------------------|---------|
| LIMD1 promoter genotype     | 1% O <sub>2</sub> (h) | siRNA          | N | Mean  | SEM      | Test Results             |         |
|                             |                       |                |   |       |          | Comparison               | P value |
| HRE WT                      | 0                     | NT             | 3 | 1     | 0        | 48h NT vs HIF-1 $\alpha$ | < 0.001 |
|                             |                       | HIF-1 $\alpha$ | 3 | 1.376 | 0.430625 |                          |         |
|                             |                       | HIF-2 $\alpha$ | 3 | 0.992 | 0.151313 |                          |         |
|                             | 24                    | NT             | 3 | 3.006 | 0.404933 |                          |         |
|                             |                       | HIF-1 $\alpha$ | 3 | 2.373 | 0.377416 |                          |         |
|                             |                       | HIF-2 $\alpha$ | 3 | 3.073 | 0.516907 |                          |         |
|                             | 48                    | NT             | 3 | 2.61  | 0.285418 |                          |         |
|                             |                       | HIF-1 $\alpha$ | 3 | 3.713 | 0.675008 |                          |         |
|                             |                       | HIF-2 $\alpha$ | 3 | 2.201 | 0.363635 |                          |         |
| HRE MUT                     | 0                     | NT             | 3 | 1.35  | 0.121175 |                          |         |
|                             |                       | HIF-1 $\alpha$ | 3 | 1.234 | 0.208299 |                          |         |
|                             |                       | HIF-2 $\alpha$ | 3 | 1.267 | 0.247729 |                          |         |
|                             | 24                    | NT             | 3 | 4.37  | 0.850149 |                          |         |
|                             |                       | HIF-1 $\alpha$ | 3 | 2.677 | 0.5502   |                          |         |
|                             |                       | HIF-2 $\alpha$ | 3 | 5.279 | 1.421119 |                          |         |
|                             | 48                    | NT             | 3 | 11.57 | 3.026199 |                          |         |
|                             |                       | HIF-1 $\alpha$ | 3 | 3.867 | 0.586527 |                          |         |
|                             |                       | HIF-2 $\alpha$ | 3 | 3.231 | 0.395111 |                          |         |

| <b>Figure 4E: Renilla Luciferase/Firefly luciferase activity</b> |                |                       |   |       |          |  |
|------------------------------------------------------------------|----------------|-----------------------|---|-------|----------|--|
| 1% O <sub>2</sub> (h)                                            | LIMD1 genotype | Reporter              | N | Mean  | SEM      |  |
| 0                                                                | LIMD1+/+       | VO                    | 3 | 1     | 0        |  |
|                                                                  |                | HIF-1 $\alpha$ 3'-UTR | 3 | 1.985 | 0.094285 |  |
|                                                                  |                | HIF-2 $\alpha$ 3'-UTR | 3 | 1.098 | 0.162449 |  |
|                                                                  | LIMD1 -/-      | VO                    | 3 | 1     | 0        |  |
|                                                                  |                | HIF-1 $\alpha$ 3'-UTR | 3 | 2.109 | 0.11414  |  |
|                                                                  |                | HIF-2 $\alpha$ 3'-UTR | 3 | 1.228 | 0.140696 |  |
| 24                                                               | LIMD1+/+       | VO                    | 3 | 1     | 0        |  |
|                                                                  |                | HIF-1 $\alpha$ 3'-UTR | 3 | 2.753 | 0.09806  |  |
|                                                                  |                | HIF-2 $\alpha$ 3'-UTR | 3 | 1.59  | 0.029087 |  |
|                                                                  | LIMD1 -/-      | VO                    | 3 | 1     | 0        |  |
|                                                                  |                | HIF-1 $\alpha$ 3'-UTR | 3 | 2.561 | 0.3195   |  |
|                                                                  |                | HIF-2 $\alpha$ 3'-UTR | 3 | 1.72  | 0.279621 |  |



**Table S5: Statistical analysis corresponding to Figure 5**

| <b>Figure 5A: HIF-1 reporter activity (Renilla Luciferase/Firefly luciferase)</b> |                         |   |          |          |                   |                |
|-----------------------------------------------------------------------------------|-------------------------|---|----------|----------|-------------------|----------------|
| 1% O <sub>2</sub> (h)                                                             | LIMD1 promoter genotype | N | Mean     | SEM      | Test Results      |                |
| 0                                                                                 | HRE WT                  | 3 | 1        | 0.008554 | <b>Comparison</b> | <b>P value</b> |
|                                                                                   | HRE MUT                 | 3 | 1.504025 | 0.004258 | 0h HRE WT vs MUT  | < 0.001        |
| 4                                                                                 | HRE WT                  | 3 | 2.151617 | 0.016207 | 4h HRE WT vs MUT  | < 0.001        |
|                                                                                   | HRE MUT                 | 3 | 3.159257 | 0.065481 | 24h HRE WT vs MUT | < 0.001        |
| 24                                                                                | HRE WT                  | 3 | 2.705828 | 0.013748 | 48h HRE WT vs MUT | < 0.001        |
|                                                                                   | HRE MUT                 | 3 | 3.632126 | 0.034875 |                   |                |
| 48                                                                                | HRE WT                  | 3 | 16.00696 | 0.309895 |                   |                |
|                                                                                   | HRE MUT                 | 3 | 23.35753 | 0.690137 |                   |                |

  

| <b>Figure 5B: HIF-1 target gene expression (mRNA)</b> |                         |   |          |          |                     |                |
|-------------------------------------------------------|-------------------------|---|----------|----------|---------------------|----------------|
| HIF-1 target gene                                     | LIMD1 promoter genotype | N | Mean     | SEM      | Test Results        |                |
| VEGF                                                  | HRE WT                  | 3 | 3.225238 | 0.358721 | <b>Comparison</b>   | <b>P value</b> |
|                                                       | HRE MUT                 | 3 | 7.184048 | 0.836913 | VEGF HRE WT vs MUT  | < 0.001        |
| BNIP3                                                 | HRE WT                  | 3 | 6.266684 | 0.262935 | BNIP3 HRE WT vs MUT | n.s.           |
|                                                       | HRE MUT                 | 3 | 7.189146 | 0.902798 | PHD2 HRE WT vs MUT  | n.s.           |
| PHD2                                                  | HRE WT                  | 3 | 1.884834 | 0.057579 | ALDOC HRE WT vs MUT | < 0.001        |
|                                                       | HRE MUT                 | 3 | 3.242134 | 0.066034 | ERO1L HRE WT vs MUT | n.s.           |
| ALDOC                                                 | HRE WT                  | 3 | 18.93575 | 4.245962 | HK1 HRE WT vs MUT   | n.s.           |
|                                                       | HRE MUT                 | 3 | 29.0115  | 1.140679 |                     |                |
| ERO1L                                                 | HRE WT                  | 3 | 1.963057 | 0.027365 |                     |                |
|                                                       | HRE MUT                 | 3 | 3.04568  | 0.014153 |                     |                |
| HK1                                                   | HRE WT                  | 3 | 1.200349 | 0.107589 |                     |                |
|                                                       | HRE MUT                 | 3 | 2.732961 | 0.29073  |                     |                |

  

| <b>Figure 5C: Secreted VEGF-A</b> |                         |   |         |          |                   |                |
|-----------------------------------|-------------------------|---|---------|----------|-------------------|----------------|
| 1% O <sub>2</sub> (h)             | LIMD1 promoter genotype | N | Mean    | SEM      | Test Results      |                |
| 0                                 | HRE WT                  | 3 | 287.012 | 16.08936 | <b>Comparison</b> | <b>P value</b> |
|                                   | HRE MUT                 | 3 | 309.225 | 8.524913 | 0h HRE WT vs MUT  | n.s.           |
| 48                                | HRE WT                  | 3 | 439.351 | 4.404423 | 48h HRE WT vs MUT | 0.025          |
|                                   | HRE MUT                 | 3 | 498.88  | 38.11353 |                   |                |

  

| <b>Figure 5D: Tumour volume</b> |    |          |              |                   |                |  |
|---------------------------------|----|----------|--------------|-------------------|----------------|--|
| LIMD1 promoter genotype         | N  | Mean     | Plot centile | Test Results      |                |  |
| HRE WT                          | 23 | 454.8569 | 5-95         | <b>Comparison</b> | <b>P value</b> |  |
| HRE MUT                         | 24 | 598.0831 | 5-95         | HRE WT vs MUT     | 0.005          |  |

  

| <b>Figure 5F: Blood Vessel Density</b> |    |          |              |                   |                |  |
|----------------------------------------|----|----------|--------------|-------------------|----------------|--|
| LIMD1 promoter genotype                | N  | Mean     | Plot centile | Test Results      |                |  |
| HRE WT                                 | 23 | 10.24788 | 5-95         | <b>Comparison</b> | <b>P value</b> |  |
| HRE MUT                                | 24 | 13.63644 | 5-95         | HRE WT vs MUT     | < 0.001        |  |

  

| <b>Figure 5G: Endomucin mRNA expression</b> |    |          |                   |                |  |  |
|---------------------------------------------|----|----------|-------------------|----------------|--|--|
| LIMD1 promoter genotype                     | N  | Mean     | Test Results      |                |  |  |
| HRE WT                                      | 15 | 6.302935 | <b>Comparison</b> | <b>P value</b> |  |  |
| HRE MUT                                     | 14 | 9.988339 | HRE WT vs MUT     | 0.0018         |  |  |

  

| <b>Figure 5H: VEGF-A mRNA expression</b> |    |          |                   |                |  |  |
|------------------------------------------|----|----------|-------------------|----------------|--|--|
| LIMD1 promoter genotype                  | N  | Mean     | Test Results      |                |  |  |
| HRE WT                                   | 15 | 0.050267 | <b>Comparison</b> | <b>P value</b> |  |  |
| HRE MUT                                  | 14 | 0.079286 | HRE WT vs MUT     | 0.038          |  |  |

  

| <b>Figure 5I: HK1 mRNA expression</b> |    |          |                   |                |  |  |
|---------------------------------------|----|----------|-------------------|----------------|--|--|
| LIMD1 promoter genotype               | N  | Mean     | Test Results      |                |  |  |
| HRE WT                                | 15 | 0.14703  | <b>Comparison</b> | <b>P value</b> |  |  |
| HRE MUT                               | 14 | 0.394601 | HRE WT vs MUT     | 0.0033         |  |  |

  

| <b>Figure 5J: PDK1 mRNA expression</b> |    |          |                   |                |  |  |
|----------------------------------------|----|----------|-------------------|----------------|--|--|
| LIMD1 promoter genotype                | N  | Mean     | Test Results      |                |  |  |
| HRE WT                                 | 15 | 2.079316 | <b>Comparison</b> | <b>P value</b> |  |  |
| HRE MUT                                | 14 | 3.901869 | HRE WT vs MUT     | 0.011          |  |  |

**Table S6: Statistical analysis corresponding to Figure EV1**

| <b>Figure EV1B: LIMD1 protein densitometry</b> |           |   |             |          |                 |          |  |
|------------------------------------------------|-----------|---|-------------|----------|-----------------|----------|--|
| Cell line                                      | 1% O2 (h) | N | Mean        | SEM      | Test Results    |          |  |
|                                                |           |   |             |          | Comparison      | P value  |  |
| SAEC                                           | 0         |   |             | 1        | 0               |          |  |
|                                                | 4         |   | 0.814549474 | 0.203549 | SAEC 0h vs. 48h | 0.022657 |  |
|                                                | 8         |   | 1.444032805 | 0.340638 | HDF 0h vs. 48h  | 0.026235 |  |
|                                                | 16        |   | 1.647395773 | 0.150907 |                 |          |  |
|                                                | 24        |   | 2.224609207 | 0.208663 |                 |          |  |
|                                                | 48        |   | 2.919424007 | 0.29907  |                 |          |  |
| HDF                                            | 0         |   |             | 1        | 0               |          |  |
|                                                | 4         |   | 1.165514296 | 0.236183 |                 |          |  |
|                                                | 8         |   | 1.317969226 | 0.296096 |                 |          |  |
|                                                | 16        |   | 1.687970809 | 0.271558 |                 |          |  |
|                                                | 24        |   | 1.846418628 | 0.293968 |                 |          |  |
|                                                | 48        |   | 2.238126911 | 0.301914 |                 |          |  |

| <b>Figure EV1C: PHD2 mRNA</b> |           |   |          |          |                   |         |  |
|-------------------------------|-----------|---|----------|----------|-------------------|---------|--|
| Cell line                     | 1% O2 (h) | N | Mean     | SEM      | Test Results      |         |  |
|                               |           |   |          |          | Comparison        | P value |  |
| A549                          | 0         | 3 |          | 1        | 0.087979          |         |  |
|                               | 4         | 3 | 1.730201 | 0.050168 | A549 0h vs. 48h   | 0.042   |  |
|                               | 24        | 3 | 1.911079 | 0.169063 | HeLa 0h vs. 48h   | 0.027   |  |
|                               | 48        | 3 | 1.642051 | 0.276446 | HEK293 0h vs. 48h | 0.005   |  |
| HeLa                          | 0         | 3 |          | 1        | 0.045582          |         |  |
|                               | 4         | 3 | 2.81952  | 0.151835 | U2OS 0h vs. 48h   | 0.032   |  |
|                               | 24        | 3 | 3.577857 | 0.461736 |                   |         |  |
|                               | 48        | 3 | 3.378797 | 0.553669 |                   |         |  |
| HEK293                        | 0         | 3 |          | 1        | 0.00631           |         |  |
|                               | 4         | 3 | 2.963837 | 0.435978 |                   |         |  |
|                               | 24        | 3 | 3.753285 | 0.243858 |                   |         |  |
|                               | 48        | 3 | 3.487724 | 0.24913  |                   |         |  |
| U2OS                          | 0         | 3 |          | 1        | 0.01183           |         |  |
|                               | 4         | 3 | 2.670475 | 0.072294 |                   |         |  |
|                               | 24        | 3 | 2.095063 | 0.113342 |                   |         |  |
|                               | 48        | 3 | 2.041784 | 0.045367 |                   |         |  |

| <b>Figure EV1D: PHD1 mRNA</b> |           |   |          |          |          |
|-------------------------------|-----------|---|----------|----------|----------|
| Cell line                     | 1% O2 (h) | N | Mean     | SEM      |          |
| A549                          | 0         | 3 |          | 1        | 0.251317 |
|                               | 4         | 3 | 1.137757 | 0.010567 |          |
|                               | 24        | 3 | 1.168199 | 0.083954 |          |
|                               | 48        | 3 | 1.219928 | 0.007718 |          |
| HeLa                          | 0         | 3 |          | 1        | 0.146334 |
|                               | 4         | 3 | 1.014056 | 0.050019 |          |
|                               | 24        | 3 | 0.694706 | 0.02901  |          |
|                               | 48        | 3 | 1.119545 | 0.035926 |          |
| HEK293                        | 0         | 3 |          | 1        | 0.066921 |
|                               | 4         | 3 | 1.168925 | 0.403475 |          |
|                               | 24        | 3 | 1.043164 | 0.09847  |          |
|                               | 48        | 3 | 0.79594  | 0.154276 |          |
| U2OS                          | 0         | 3 |          | 1        | 0.215434 |
|                               | 4         | 3 | 1.034054 | 0.195074 |          |
|                               | 24        | 3 | 0.928844 | 0.09139  |          |
|                               | 48        | 3 | 0.867316 | 0.050044 |          |

**Table S6 continued: Statistical analysis corresponding to Figure EV1**

| <b>Figure EV1E: PHD2 protein densitometry</b> |           |   |          |  |
|-----------------------------------------------|-----------|---|----------|--|
| Cell line                                     | 1% O2 (h) | N | Value    |  |
| A549                                          | 0         | 1 | 1        |  |
|                                               | 4         | 1 | 2.288695 |  |
|                                               | 24        | 1 | 3.030097 |  |
| HeLa                                          | 0         | 1 | 1        |  |
|                                               | 4         | 1 | 2.487166 |  |
|                                               | 24        | 1 | 2.554849 |  |
| HEK293                                        | 0         | 1 | 1        |  |
|                                               | 4         | 1 | 2.496161 |  |
|                                               | 24        | 1 | 3.693751 |  |
| U2OS                                          | 0         | 1 | 1        |  |
|                                               | 4         | 1 | 2.241257 |  |
|                                               | 24        | 1 | 4.015522 |  |

| <b>Figure EV1F: HIF-1<math>\alpha</math> protein densitometry</b> |           |   |          |  |
|-------------------------------------------------------------------|-----------|---|----------|--|
| Cell line                                                         | 1% O2 (h) | N | Value    |  |
| A549                                                              | 0         | 1 | 1        |  |
|                                                                   | 4         | 1 | 2.361423 |  |
|                                                                   | 24        | 1 | 0.908581 |  |
| HeLa                                                              | 0         | 1 | 1        |  |
|                                                                   | 4         | 1 | 5.285539 |  |
|                                                                   | 24        | 1 | 1.666913 |  |
| HEK293                                                            | 0         | 1 | 1        |  |
|                                                                   | 4         | 1 | 5.113687 |  |
|                                                                   | 24        | 1 | 8.229166 |  |
| U2OS                                                              | 0         | 1 | 1        |  |
|                                                                   | 4         | 1 | 2.479092 |  |
|                                                                   | 24        | 1 | 0.807874 |  |

| <b>Figure EV1G: HIF-2<math>\alpha</math> protein densitometry</b> |           |   |          |  |
|-------------------------------------------------------------------|-----------|---|----------|--|
| Cell line                                                         | 1% O2 (h) | N | Value    |  |
| A549                                                              | 0         | 1 | 1        |  |
|                                                                   | 4         | 1 | 6.111773 |  |
|                                                                   | 24        | 1 | 1.361769 |  |
| HeLa                                                              | 0         | 1 | 1        |  |
|                                                                   | 4         | 1 | 3.150834 |  |
|                                                                   | 24        | 1 | 2.536862 |  |
| HEK293                                                            | 0         | 1 | 1        |  |
|                                                                   | 4         | 1 | 8.904363 |  |
|                                                                   | 24        | 1 | 8.133206 |  |
| U2OS                                                              | 0         | 1 | 1        |  |
|                                                                   | 4         | 1 | 0.782921 |  |
|                                                                   | 24        | 1 | 0.524142 |  |

| <b>Figure EV1J: Renilla Luciferase/Firefly luciferase activity</b> |   |          |          |  |
|--------------------------------------------------------------------|---|----------|----------|--|
| Reporter construct                                                 | N | Mean     | SEM      |  |
| VO                                                                 | 3 | 1.000058 | 0.336296 |  |
| WT LIMD1 promoter                                                  | 3 | 3.725871 | 0.231057 |  |
| $\Delta$ 1                                                         | 3 | 2.074619 | 0.064489 |  |
| $\Delta$ 2                                                         | 3 | 2.699325 | 0.11087  |  |
| $\Delta$ 3                                                         | 3 | 1.254855 | 0.200267 |  |
| $\Delta$ 4                                                         | 3 | 2.651687 | 0.122075 |  |
| $\Delta$ 5                                                         | 3 | 2.883119 | 0.196423 |  |
| $\Delta$ 6                                                         | 3 | 2.537705 | 0.306687 |  |
| $\Delta$ 7                                                         | 3 | 2.85969  | 0.451653 |  |
| $\Delta$ 8                                                         | 3 | 2.350204 | 0.159177 |  |
| $\Delta$ 9                                                         | 3 | 2.465529 | 0.110371 |  |
| $\Delta$ 10                                                        | 3 | 2.867579 | 0.146105 |  |

**Table S7: Statistical analysis corresponding to Figure EV2**

| <b>Figure EV2A: Renilla Luciferase/Firefly luciferase activity</b> |                  |   |          |          |  |
|--------------------------------------------------------------------|------------------|---|----------|----------|--|
| 1% O <sub>2</sub> (h)                                              | shRNA            | N | Mean     | SEM      |  |
| 0                                                                  | shSCR            | 3 | 1        | 0        |  |
|                                                                    | shHIF-1 $\alpha$ | 3 | 1        | 0        |  |
|                                                                    | shHIF-2 $\alpha$ | 3 | 1        | 0        |  |
| 4                                                                  | shSCR            | 3 | 16.455   | 2.574285 |  |
|                                                                    | shHIF-1 $\alpha$ | 3 | 4.50364  | 1.532525 |  |
|                                                                    | shHIF-2 $\alpha$ | 3 | 24.11767 | 3.173892 |  |
| 8                                                                  | shSCR            | 3 | 37.49693 | 3.034482 |  |
|                                                                    | shHIF-1 $\alpha$ | 3 | 7.724148 | 1.236423 |  |
|                                                                    | shHIF-2 $\alpha$ | 3 | 47.52997 | 4.51451  |  |
| 24                                                                 | shSCR            | 3 | 72.61085 | 6.055389 |  |
|                                                                    | shHIF-1 $\alpha$ | 3 | 16.67209 | 2.191585 |  |
|                                                                    | shHIF-2 $\alpha$ | 3 | 86.37336 | 8.205971 |  |

| <b>Figure EV2E: HeLa LIMD1 mRNA</b> |                |   |          |          |  | <b>Test Results</b>                     |                |
|-------------------------------------|----------------|---|----------|----------|--|-----------------------------------------|----------------|
| % O <sub>2</sub>                    | siRNA          | N | Mean     | SEM      |  | <b>Comparison</b>                       | <b>P value</b> |
| 20                                  | NT             | 3 | 1        | 0        |  |                                         |                |
|                                     | LIMD1          | 3 | 0.430891 | 0.081721 |  | 20% O <sub>2</sub> NT vs LIMD1          | 0.0031         |
|                                     | PHD2           | 3 | 1.192083 | 0.107235 |  | 20% O <sub>2</sub> NT vs PHD2           | n.s.           |
|                                     | HIF-1 $\alpha$ | 3 | 1.024563 | 0.054263 |  | 20% O <sub>2</sub> NT vs HIF-1 $\alpha$ | n.s.           |
|                                     | HIF-2 $\alpha$ | 3 | 1.265639 | 0.107171 |  | 20% O <sub>2</sub> NT vs HIF-2 $\alpha$ | n.s.           |
| 1                                   | NT             | 3 | 1        |          |  | 1% O <sub>2</sub> NT vs LIMD1           | 0.0106         |
|                                     | LIMD1          | 3 | 0.455398 | 0.068415 |  | 1% O <sub>2</sub> NT vs PHD2            | n.s.           |
|                                     | PHD2           | 3 | 1.644004 | 0.547063 |  | 1% O <sub>2</sub> NT vs HIF-1 $\alpha$  | 0.0035         |
|                                     | HIF-1 $\alpha$ | 3 | 0.329133 | 0.017432 |  | 1% O <sub>2</sub> NT vs HIF-2 $\alpha$  | n.s.           |
|                                     | HIF-2 $\alpha$ | 3 | 1.399395 | 0.022244 |  |                                         |                |

| <b>Figure EV2F: U2OS HIF-1<math>\alpha</math> mRNA</b> |                |   |          |          |  | <b>Test Results</b>                     |                |
|--------------------------------------------------------|----------------|---|----------|----------|--|-----------------------------------------|----------------|
| % O <sub>2</sub>                                       | siRNA          | N | Mean     | SEM      |  | <b>Comparison</b>                       | <b>P value</b> |
| 20                                                     | NT             | 3 | 1        | 0        |  |                                         |                |
|                                                        | LIMD1          | 3 | 0.832197 | 0.066773 |  | 20% O <sub>2</sub> NT vs LIMD1          | n.s.           |
|                                                        | PHD2           | 3 | 0.722169 | 0.006445 |  | 20% O <sub>2</sub> NT vs PHD2           | n.s.           |
|                                                        | HIF-1 $\alpha$ | 3 | 0.081694 | 0.001458 |  | 20% O <sub>2</sub> NT vs HIF-1 $\alpha$ | 0.001          |
|                                                        | HIF-2 $\alpha$ | 3 | 0.894843 | 0.059853 |  | 20% O <sub>2</sub> NT vs HIF-2 $\alpha$ | n.s.           |
| 1                                                      | NT             | 3 | 1        | 0        |  | 1% O <sub>2</sub> NT vs LIMD1           | n.s.           |
|                                                        | LIMD1          | 3 | 1.045075 | 0.004664 |  | 1% O <sub>2</sub> NT vs PHD2            | n.s.           |
|                                                        | PHD2           | 3 | 1.021964 | 0.013681 |  | 1% O <sub>2</sub> NT vs HIF-1 $\alpha$  | 0.001          |
|                                                        | HIF-1 $\alpha$ | 3 | 0.086137 | 0.001922 |  | 1% O <sub>2</sub> NT vs HIF-2 $\alpha$  | n.s.           |
|                                                        | HIF-2 $\alpha$ | 3 | 0.917288 | 0.01228  |  |                                         |                |

**Table S7 continued: Statistical analysis corresponding to Figure EV2**

| <b>Figure EV2G: U2OS HIF-2<math>\alpha</math> mRNA</b> |                |   |          |          |                                         |                |  |
|--------------------------------------------------------|----------------|---|----------|----------|-----------------------------------------|----------------|--|
| % O <sub>2</sub>                                       | siRNA          | N | Mean     | SEM      | <b>Test Results</b>                     |                |  |
|                                                        |                |   |          |          | <b>Comparison</b>                       | <b>P value</b> |  |
| 20                                                     | NT             | 3 | 1        | 0        |                                         |                |  |
|                                                        | LIMD1          | 3 | 0.820589 | 0.031927 | 20% O <sub>2</sub> NT vs LIMD1          | 0.097          |  |
|                                                        | PHD2           | 3 | 0.556566 | 0.045975 | 20% O <sub>2</sub> NT vs PHD2           | 0.022          |  |
|                                                        | HIF-1 $\alpha$ | 3 | 0.660805 | 0.028922 | 20% O <sub>2</sub> NT vs HIF-1 $\alpha$ | 0.055          |  |
|                                                        | HIF-2 $\alpha$ | 3 | 0.148344 | 0        | 20% O <sub>2</sub> NT vs HIF-2 $\alpha$ | 0.008          |  |
| 1                                                      | NT             | 3 | 1        |          | 1% O <sub>2</sub> NT vs LIMD1           | 0.055          |  |
|                                                        | LIMD1          | 3 | 0.594552 | 0.011568 | 1% O <sub>2</sub> NT vs PHD2            | 0.015          |  |
|                                                        | PHD2           | 3 | 0.447945 | 0.032658 | 1% O <sub>2</sub> NT vs HIF-1 $\alpha$  | 0.022          |  |
|                                                        | HIF-1 $\alpha$ | 3 | 0.557362 | 0.010845 | 1% O <sub>2</sub> NT vs HIF-2 $\alpha$  | 0.003          |  |
|                                                        | HIF-2 $\alpha$ | 3 | 0.067357 | 0.008497 |                                         |                |  |

| <b>Figure EV2H: HeLa HIF-1<math>\alpha</math> mRNA</b> |                |   |          |          |                                         |                |  |
|--------------------------------------------------------|----------------|---|----------|----------|-----------------------------------------|----------------|--|
| % O <sub>2</sub>                                       | siRNA          | N | Mean     | SEM      | <b>Test Results</b>                     |                |  |
|                                                        |                |   |          |          | <b>Comparison</b>                       | <b>P value</b> |  |
| 20                                                     | NT             | 3 | 1        | 0        |                                         |                |  |
|                                                        | LIMD1          | 3 | 0.977814 | 0.190766 | 20% O <sub>2</sub> NT vs LIMD1          | n.s.           |  |
|                                                        | PHD2           | 3 | 0.733831 | 0.155992 | 20% O <sub>2</sub> NT vs PHD2           | 0.078          |  |
|                                                        | HIF-1 $\alpha$ | 3 | 0.142944 | 0.005102 | 20% O <sub>2</sub> NT vs HIF-1 $\alpha$ | 0.001          |  |
|                                                        | HIF-2 $\alpha$ | 3 | 0.937373 | 0.033456 | 20% O <sub>2</sub> NT vs HIF-2 $\alpha$ | n.s.           |  |
| 1                                                      | NT             | 3 | 1        | 0        | 1% O <sub>2</sub> NT vs LIMD1           | 0.074          |  |
|                                                        | LIMD1          | 3 | 1.940898 | 0.361651 | 1% O <sub>2</sub> NT vs PHD2            | 0.055          |  |
|                                                        | PHD2           | 3 | 1.532716 | 0.43188  | 1% O <sub>2</sub> NT vs HIF-1 $\alpha$  | 0.002          |  |
|                                                        | HIF-1 $\alpha$ | 3 | 0.196936 | 0.010541 | 1% O <sub>2</sub> NT vs HIF-2 $\alpha$  | 0.078          |  |
|                                                        | HIF-2 $\alpha$ | 3 | 1.140575 | 0.00509  |                                         |                |  |

| <b>Figure EV2I: HeLa HIF-2<math>\alpha</math> mRNA</b> |                |   |          |          |                                         |                |  |
|--------------------------------------------------------|----------------|---|----------|----------|-----------------------------------------|----------------|--|
| % O <sub>2</sub>                                       | siRNA          | N | Mean     | SEM      | <b>Test Results</b>                     |                |  |
|                                                        |                |   |          |          | <b>Comparison</b>                       | <b>P value</b> |  |
| 20                                                     | NT             | 3 | 1        | 0        |                                         |                |  |
|                                                        | LIMD1          | 3 | 0.575096 | 0.108459 | 20% O <sub>2</sub> NT vs LIMD1          | n.s.           |  |
|                                                        | PHD2           | 3 | 0.320513 | 0.023367 | 20% O <sub>2</sub> NT vs PHD2           | 0.005          |  |
|                                                        | HIF-1 $\alpha$ | 3 | 0.402389 | 0.0137   | 20% O <sub>2</sub> NT vs HIF-1 $\alpha$ | 0.044          |  |
|                                                        | HIF-2 $\alpha$ | 3 | 0.122585 | 0.008937 | 20% O <sub>2</sub> NT vs HIF-2 $\alpha$ | 0.003          |  |
| 1                                                      | NT             | 3 | 1        | 0        | 1% O <sub>2</sub> NT vs LIMD1           | 0.039          |  |
|                                                        | LIMD1          | 3 | 1.676209 | 0.130336 | 1% O <sub>2</sub> NT vs PHD2            | 0.046          |  |
|                                                        | PHD2           | 3 | 1.15528  | 0.112224 | 1% O <sub>2</sub> NT vs HIF-1 $\alpha$  | 0.036          |  |
|                                                        | HIF-1 $\alpha$ | 3 | 0.586705 | 0.048465 | 1% O <sub>2</sub> NT vs HIF-2 $\alpha$  | 0.005          |  |
|                                                        | HIF-2 $\alpha$ | 3 | 0.163349 | 0.005561 |                                         |                |  |

**Table S8: Statistical analysis corresponding to Figure EV3**

| <b>Figure EV3B: U2OS LIMD1 protein densitometry</b> |                                |          |             |            |                   | <b>Test Results</b> |  |
|-----------------------------------------------------|--------------------------------|----------|-------------|------------|-------------------|---------------------|--|
| <b>1% O2 (h)</b>                                    | <b>LIMD1 promoter genotype</b> | <b>N</b> | <b>Mean</b> | <b>SEM</b> | <b>Comparison</b> | <b>P value</b>      |  |
| 0                                                   | HRE WT                         | 3        | 1           | 0          | 0h HRE WT vs MUT  | n.s.                |  |
|                                                     | HRE MUT                        | 3        | 0.968741    | 0.090075   | 4h HRE WT vs MUT  | n.s.                |  |
| 4                                                   | HRE WT                         | 3        | 1.457119    | 0.405613   | 24h HRE WT vs MUT | n.s.                |  |
|                                                     | HRE MUT                        | 3        | 1.054535    | 0.239482   | 48h HRE WT vs MUT | < 0.001             |  |
| 24                                                  | HRE WT                         | 3        | 2.04019     | 0.366225   |                   |                     |  |
|                                                     | HRE MUT                        | 3        | 0.939389    | 0.329581   |                   |                     |  |
| 48                                                  | HRE WT                         | 3        | 2.592545    | 0.338275   |                   |                     |  |
|                                                     | HRE MUT                        | 3        | 0.646413    | 0.241377   |                   |                     |  |

  

| <b>Figure EV3C: U2OS Flag protein densitometry</b> |                                |          |             |            |                   | <b>Test Results</b> |  |
|----------------------------------------------------|--------------------------------|----------|-------------|------------|-------------------|---------------------|--|
| <b>1% O2 (h)</b>                                   | <b>LIMD1 promoter genotype</b> | <b>N</b> | <b>Mean</b> | <b>SEM</b> | <b>Comparison</b> | <b>P value</b>      |  |
| 0                                                  | HRE WT                         | 3        | 1           | 0          | 0h HRE WT vs MUT  | n.s.                |  |
|                                                    | HRE MUT                        | 3        | 0.882484    | 0.133817   | 4h HRE WT vs MUT  | n.s.                |  |
| 4                                                  | HRE WT                         | 3        | 1.511969    | 0.272387   | 24h HRE WT vs MUT | n.s.                |  |
|                                                    | HRE MUT                        | 3        | 1.324088    | 0.22777    | 48h HRE WT vs MUT | < 0.001             |  |
| 24                                                 | HRE WT                         | 3        | 1.87307     | 0.117384   |                   |                     |  |
|                                                    | HRE MUT                        | 3        | 1.406213    | 0.163232   |                   |                     |  |
| 48                                                 | HRE WT                         | 3        | 2.268933    | 0.243158   |                   |                     |  |
|                                                    | HRE MUT                        | 3        | 1.244311    | 0.086561   |                   |                     |  |

  

| <b>Figure EV3D: HeLa LIMD1 protein densitometry</b> |                                |          |             |            |                   | <b>Test Results</b> |  |
|-----------------------------------------------------|--------------------------------|----------|-------------|------------|-------------------|---------------------|--|
| <b>1% O2 (h)</b>                                    | <b>LIMD1 promoter genotype</b> | <b>N</b> | <b>Mean</b> | <b>SEM</b> | <b>Comparison</b> | <b>P value</b>      |  |
| 0                                                   | HRE WT                         | 3        | 1           | 0          | 0h HRE WT vs MUT  | n.s.                |  |
|                                                     | HRE MUT                        | 3        | 1           | 0          | 4h HRE WT vs MUT  | 0.433               |  |
| 4                                                   | HRE WT                         | 3        | 1.892217    | 0.229249   | 8h HRE WT vs MUT  | 0.113               |  |
|                                                     | HRE MUT                        | 3        | 1.531759    | 0.455872   | 16h HRE WT vs MUT | 0.914               |  |
| 8                                                   | HRE WT                         | 3        | 2.101769    | 0.558619   | 24h HRE WT vs MUT | 0.014               |  |
|                                                     | HRE MUT                        | 3        | 1.807513    | 0.604396   | 48h HRE WT vs MUT | 0.020               |  |
| 16                                                  | HRE WT                         | 3        | 1.990277    | 0.612288   |                   |                     |  |
|                                                     | HRE MUT                        | 3        | 1.962912    | 0.599207   |                   |                     |  |
| 24                                                  | HRE WT                         | 3        | 3.203586    | 0.294965   |                   |                     |  |
|                                                     | HRE MUT                        | 3        | 2.038284    | 0.318379   |                   |                     |  |
| 48                                                  | HRE WT                         | 3        | 2.469491    | 0.614722   |                   |                     |  |
|                                                     | HRE MUT                        | 3        | 1.317699    | 0.450292   |                   |                     |  |

  

| <b>Figure EV3E: SAEC LIMD1 protein densitometry</b> |                                |          |             |            |                   | <b>Test Results</b> |  |
|-----------------------------------------------------|--------------------------------|----------|-------------|------------|-------------------|---------------------|--|
| <b>1% O2 (h)</b>                                    | <b>LIMD1 promoter genotype</b> | <b>N</b> | <b>Mean</b> | <b>SEM</b> | <b>Comparison</b> | <b>P value</b>      |  |
| 0                                                   | HRE WT                         | 4        | 1           | 0          | 0h HRE WT vs MUT  | 0.461               |  |
|                                                     | HRE MUT                        | 4        | 0.979634    | 0.200951   | 4h HRE WT vs MUT  | 0.465               |  |
| 4                                                   | HRE WT                         | 4        | 1.628498    | 0.507424   | 8h HRE WT vs MUT  | 0.419               |  |
|                                                     | HRE MUT                        | 4        | 1.577723    | 0.210042   | 16h HRE WT vs MUT | 0.075               |  |
| 24                                                  | HRE WT                         | 4        | 1.448758    | 0.337276   | 24h HRE WT vs MUT | 0.021               |  |
|                                                     | HRE MUT                        | 4        | 1.184112    | 0.280129   | 48h HRE WT vs MUT | 0.031               |  |
| 16                                                  | HRE WT                         | 4        | 2.337482    | 0.613342   |                   |                     |  |
|                                                     | HRE MUT                        | 4        | 1.244539    | 0.251227   |                   |                     |  |
| 24                                                  | HRE WT                         | 4        | 4.309099    | 0.780332   |                   |                     |  |
|                                                     | HRE MUT                        | 4        | 2.199186    | 0.265905   |                   |                     |  |
| 48                                                  | HRE WT                         | 4        | 3.851951    | 0.969686   |                   |                     |  |
|                                                     | HRE MUT                        | 4        | 1.861908    | 0.232557   |                   |                     |  |

**Table S8 continued: Statistical analysis corresponding to Figure EV3**

| <b>Figure EV3F: HeLa HIF-1 mRNA</b> |                                |          |             |            |  | <b>Test Results</b> |                |
|-------------------------------------|--------------------------------|----------|-------------|------------|--|---------------------|----------------|
| <b>1% O<sub>2</sub> (h)</b>         | <b>LIMD1 promoter genotype</b> | <b>N</b> | <b>Mean</b> | <b>SEM</b> |  | <b>Comparison</b>   | <b>P value</b> |
| 0                                   | HRE WT                         | 3        | 5.614191    | 0.77417    |  | 0h HRE WT vs MUT    | n.s.           |
|                                     | HRE MUT                        | 3        | 4.262376    | 0.644226   |  | 4h HRE WT vs MUT    | n.s.           |
| 4                                   | HRE WT                         | 3        | 4.891543    | 0.847023   |  | 24h HRE WT vs MUT   | <0.001         |
|                                     | HRE MUT                        | 3        | 6.353057    | 0.819861   |  |                     |                |
| 24                                  | HRE WT                         | 3        | 7.385615    | 0.164774   |  |                     |                |
|                                     | HRE MUT                        | 3        | 9.081321    | 0.243118   |  |                     |                |

  

| <b>Figure EV3G: HeLa HIF-1 reporter activity</b> |                                |          |             |            |  | <b>Test Results</b> |                |
|--------------------------------------------------|--------------------------------|----------|-------------|------------|--|---------------------|----------------|
| <b>1% O<sub>2</sub> (h)</b>                      | <b>LIMD1 promoter genotype</b> | <b>N</b> | <b>Mean</b> | <b>SEM</b> |  | <b>Comparison</b>   | <b>P value</b> |
| 0                                                | HRE WT                         | 3        | 1           | 0.119612   |  | 0h HRE WT vs MUT    | n.s.           |
|                                                  | HRE MUT                        | 3        | 0.950657    | 0.126442   |  | 4h HRE WT vs MUT    | n.s.           |
| 4                                                | HRE WT                         | 3        | 6.220234    | 0.791379   |  | 24h HRE WT vs MUT   | <0.001         |
|                                                  | HRE MUT                        | 3        | 6.809766    | 0.423903   |  |                     |                |
| 24                                               | HRE WT                         | 3        | 89.25114    | 4.627653   |  |                     |                |
|                                                  | HRE MUT                        | 3        | 135.7146    | 11.51675   |  |                     |                |

  

| <b>Figure EV3H: HIF-1 target gene expression (mRNA) 20% O<sub>2</sub> U2OS</b> |                                |          |             |            |  | <b>Test Results</b> |                |
|--------------------------------------------------------------------------------|--------------------------------|----------|-------------|------------|--|---------------------|----------------|
| <b>HIF-1 target gene</b>                                                       | <b>LIMD1 promoter genotype</b> | <b>N</b> | <b>Mean</b> | <b>SEM</b> |  | <b>Comparison</b>   | <b>P value</b> |
| VEGF                                                                           | HRE WT                         | 3        | 1           | 0.184695   |  | VEGF HRE WT vs MUT  | n.s.           |
|                                                                                | HRE MUT                        | 3        | 1.040703    | 0.132202   |  | BNIP3 HRE WT vs MUT | n.s.           |
| BNIP3                                                                          | HRE WT                         | 3        | 1           | 0.041958   |  | ALDOC HRE WT vs MUT | 0.042          |
|                                                                                | HRE MUT                        | 3        | 1.062439    | 0.089076   |  | ERO1L HRE WT vs MUT | 0.011          |
| ALDOC                                                                          | HRE WT                         | 3        | 1           | 0.018656   |  | HK1 HRE WT vs MUT   | n.s.           |
|                                                                                | HRE MUT                        | 3        | 1.188325    | 0.040885   |  |                     |                |
| ERO1L                                                                          | HRE WT                         | 3        | 1           | 0.125137   |  |                     |                |
|                                                                                | HRE MUT                        | 3        | 1.20204     | 0.105991   |  |                     |                |
| HK1                                                                            | HRE WT                         | 3        | 1           | 0.050464   |  |                     |                |
|                                                                                | HRE MUT                        | 3        | 1.292022    | 0.057961   |  |                     |                |

**Table S8 continued: Statistical analysis corresponding to Figure EV3**

| <b>Figure EV3I: HIF-1 target gene expression (mRNA) 20% O2 HeLa</b> |                         |   |          |          |                     |         |
|---------------------------------------------------------------------|-------------------------|---|----------|----------|---------------------|---------|
| HIF-1 target gene                                                   | LIMD1 promoter genotype | N | Mean     | SEM      | Test Results        |         |
|                                                                     |                         |   |          |          | Comparison          | P value |
| VEGF                                                                | HRE WT                  | 3 | 1        | 0.058347 | VEGF HRE WT vs MUT  | n.s.    |
|                                                                     | HRE MUT                 | 3 | 0.977678 | 0.062224 |                     |         |
| BNIP3                                                               | HRE WT                  | 3 | 1        | 0.146368 | BNIP3 HRE WT vs MUT | n.s.    |
|                                                                     | HRE MUT                 | 3 | 1.201496 | 0.025211 |                     |         |
| ALDOC                                                               | HRE WT                  | 3 | 1        | 0.024578 | ALDOC HRE WT vs MUT | n.s.    |
|                                                                     | HRE MUT                 | 3 | 1.052268 | 0.005173 |                     |         |
| ERO1L                                                               | HRE WT                  | 3 | 1        | 0.04181  | ERO1L HRE WT vs MUT | n.s.    |
|                                                                     | HRE MUT                 | 3 | 1.124445 | 0.073101 |                     |         |
| HK1                                                                 | HRE WT                  | 3 | 1        | 0.005609 | HK1 HRE WT vs MUT   | 0.031   |
|                                                                     | HRE MUT                 | 3 | 1.458345 | 0.024541 |                     |         |

| <b>Figure EV3J: HIF-1 target gene expression (mRNA) 1% O2 HeLa</b> |                         |   |          |          |                     |         |
|--------------------------------------------------------------------|-------------------------|---|----------|----------|---------------------|---------|
| HIF-1 target gene                                                  | LIMD1 promoter genotype | N | Mean     | SEM      | Test Results        |         |
|                                                                    |                         |   |          |          | Comparison          | P value |
| VEGF                                                               | HRE WT                  | 3 | 1.269612 | 0.094248 | VEGF HRE WT vs MUT  | <0.001  |
|                                                                    | HRE MUT                 | 3 | 1.988737 | 0.200202 |                     |         |
| BNIP3                                                              | HRE WT                  | 3 | 1.6748   | 0.096597 | BNIP3 HRE WT vs MUT | n.s.    |
|                                                                    | HRE MUT                 | 3 | 1.930247 | 0.101219 |                     |         |
| ALDOC                                                              | HRE WT                  | 3 | 1.580928 | 0.038856 | ALDOC HRE WT vs MUT | 0.012   |
|                                                                    | HRE MUT                 | 3 | 1.955033 | 0.211031 |                     |         |
| ERO1L                                                              | HRE WT                  | 3 | 1.668492 | 0.023259 | ERO1L HRE WT vs MUT | n.s.    |
|                                                                    | HRE MUT                 | 3 | 1.810212 | 0.008412 |                     |         |
| HK1                                                                | HRE WT                  | 3 | 2.279292 | 0.556926 | HK1 HRE WT vs MUT   | <0.001  |
|                                                                    | HRE MUT                 | 3 | 3.558991 | 0.358745 |                     |         |

| <b>Figure EV3K: HIF-1 target gene expression (mRNA) 1% O2 SAEC</b> |                         |   |       |       |                      |         |
|--------------------------------------------------------------------|-------------------------|---|-------|-------|----------------------|---------|
| HIF-1 target gene                                                  | LIMD1 promoter genotype | N | Mean  | SEM   | Test Results         |         |
|                                                                    |                         |   |       |       | Comparison           | P value |
| VEGF                                                               | HRE WT                  | 3 | 1.000 | 0.010 | VEGF HRE WT vs MUT   | n.s.    |
|                                                                    | HRE MUT                 | 3 | 1.359 | 0.100 |                      |         |
| BNIP3                                                              | HRE WT                  | 3 | 1.000 | 0.010 | BNIP3 HRE WT vs MUT  | n.s.    |
|                                                                    | HRE MUT                 | 3 | 1.240 | 0.050 |                      |         |
| ALDOC                                                              | HRE WT                  | 3 | 1.000 | 0.010 | ALDOC HRE WT vs MUT  | 0.057   |
|                                                                    | HRE MUT                 | 3 | 1.230 | 0.050 |                      |         |
| ERO1L                                                              | HRE WT                  | 3 | 1.000 | 0.010 | ERO1L HRE WT vs MUT  | n.s.    |
|                                                                    | HRE MUT                 | 3 | 1.090 | 0.050 |                      |         |
| SLC2A1                                                             | HRE WT                  | 3 | 1.000 | 0.030 | SLC2A1 HRE WT vs MUT | 0.052   |
|                                                                    | HRE MUT                 | 3 | 1.230 | 0.050 |                      |         |
| GAPDH                                                              | HRE WT                  | 3 | 1.000 | 0.030 | GAPDH HRE WT vs MUT  | 0.086   |
|                                                                    | HRE MUT                 | 3 | 1.220 | 0.080 |                      |         |
| PGM2                                                               | HRE WT                  | 3 | 1.000 | 0.010 | PGM2 HRE WT vs MUT   | 0.081   |
|                                                                    | HRE MUT                 | 3 | 1.120 | 0.050 |                      |         |
| ALDOA                                                              | HRE WT                  | 3 | 1.000 | 0.020 | ALDOA HRE WT vs MUT  | n.s.    |
|                                                                    | HRE MUT                 | 3 | 1.230 | 0.030 |                      |         |
| LDHA                                                               | HRE WT                  | 3 | 1.000 | 0.010 | LDHA HRE WT vs MUT   | 0.045   |
|                                                                    | HRE MUT                 | 3 | 1.170 | 0.030 |                      |         |
| PHD2                                                               | HRE WT                  | 3 | 1.000 | 0.020 | PHD2 HRE WT vs MUT   | 0.052   |
|                                                                    | HRE MUT                 | 3 | 1.370 | 0.080 |                      |         |

| <b>Figure EV3L: HeLa Secreted VEGF-A</b> |                         |   |          |          |                   |         |
|------------------------------------------|-------------------------|---|----------|----------|-------------------|---------|
| 1% O2 (h)                                | LIMD1 promoter genotype | N | Mean     | SEM      | Test Results      |         |
|                                          |                         |   |          |          | Comparison        | P value |
| 0                                        | HRE WT                  | 3 | 1171.171 | 22.93967 | 0h HRE WT vs MUT  | n.s.    |
|                                          | HRE MUT                 | 3 | 1144.058 | 44.47499 |                   |         |
| 48                                       | HRE WT                  | 3 | 1322.891 | 19.60103 | 48h HRE WT vs MUT | n.s.    |
|                                          | HRE MUT                 | 3 | 1515.217 | 25.66618 |                   |         |



**Table S9: Statistical analysis corresponding to Figure EV4**

| <b>Figure EV4A: Number of cells x 10<sup>4</sup></b> |                                |             |          |             |            |                   | <b>Test Results</b> |                          |                         |      |
|------------------------------------------------------|--------------------------------|-------------|----------|-------------|------------|-------------------|---------------------|--------------------------|-------------------------|------|
| <b>% O2</b>                                          | <b>LIMD1 promoter genotype</b> | <b>Days</b> | <b>N</b> | <b>Mean</b> | <b>SEM</b> |                   |                     |                          |                         |      |
| 20                                                   | HRE WT                         | 0           | 3        | 0.05        | 0          | <b>Comparison</b> | <b>P value</b>      |                          |                         |      |
|                                                      |                                | 3           | 3        | 0.37135     | 0.017135   |                   |                     | 20% 0 days HRE WT vs MUT | n.s.                    |      |
|                                                      |                                | 5           | 3        | 1.8225      | 0.128849   |                   |                     | 20% 3 days HRE WT vs MUT | n.s.                    |      |
|                                                      |                                | 7           | 3        | 6.102       | 0.355286   |                   |                     | 20% 5 days HRE WT vs MUT | n.s.                    |      |
|                                                      | HRE MUT                        | 0           | 3        | 0.05        | 0          |                   |                     | 20% 7 days HRE WT vs MUT | n.s.                    |      |
|                                                      |                                | 3           | 3        | 0.26865     | 0.013098   |                   |                     | 1% 0 days HRE WT vs MUT  | n.s.                    |      |
|                                                      |                                | 5           | 3        | 1.575       | 0.05592    |                   |                     | 1% 3 days HRE WT vs MUT  | n.s.                    |      |
|                                                      |                                | 7           | 3        | 5.21        | 0.141778   |                   |                     | 1% 5 days HRE WT vs MUT  | n.s.                    |      |
|                                                      | 1                              | HRE WT      | 0        | 3           | 0.05       |                   |                     | 0                        | 1% 7 days HRE WT vs MUT | n.s. |
|                                                      |                                |             | 3        | 3           | 0.2385     |                   |                     | 0.024943                 |                         |      |
|                                                      |                                |             | 5        | 3           | 0.848333   |                   |                     | 0.030322                 |                         |      |
|                                                      |                                |             | 7        | 3           | 1.443      |                   |                     | 0.101838                 |                         |      |
| HRE MUT                                              |                                | 0           | 3        | 0.05        | 0          |                   |                     |                          |                         |      |
|                                                      |                                | 3           | 3        | 0.1988      | 0.021545   |                   |                     |                          |                         |      |
|                                                      |                                | 5           | 3        | 0.795       | 0.077015   |                   |                     |                          |                         |      |
|                                                      |                                | 7           | 3        | 1.509       | 0.056338   |                   |                     |                          |                         |      |

| <b>Figure EV4B: Number of colonies</b> |                                |          |             |            |                   |                | <b>Test Results</b> |      |
|----------------------------------------|--------------------------------|----------|-------------|------------|-------------------|----------------|---------------------|------|
| <b>% O2</b>                            | <b>LIMD1 promoter genotype</b> | <b>N</b> | <b>Mean</b> | <b>SEM</b> |                   |                |                     |      |
| 20                                     | HRE WT                         | 3        | 65.3287     | 4.309052   | <b>Comparison</b> | <b>P value</b> |                     |      |
|                                        | HRE MUT                        | 3        | 71.4838     | 3.2775     |                   |                | 20% HRE WT vs MUT   | n.s. |
| 1                                      | HRE WT                         | 3        | 68.37269    | 5.255744   | 1% HRE WT vs MUT  | n.s.           |                     |      |
|                                        | HRE MUT                        | 3        | 76.63195    | 2.030395   |                   |                |                     |      |

| <b>Figure EV4C: VEGF-B mRNA expression</b> |          |             |                   | <b>Test Results</b> |               |
|--------------------------------------------|----------|-------------|-------------------|---------------------|---------------|
| <b>LIMD1 promoter genotype</b>             | <b>N</b> | <b>Mean</b> |                   |                     |               |
| HRE WT                                     | 15       | 0.937977    | <b>Comparison</b> | <b>P value</b>      |               |
| HRE MUT                                    | 14       | 2.678546    |                   |                     | HRE WT vs MUT |

| <b>Figure EV4D: VEGFC mRNA expression</b> |          |             |                   | <b>Test Results</b> |               |
|-------------------------------------------|----------|-------------|-------------------|---------------------|---------------|
| <b>LIMD1 promoter genotype</b>            | <b>N</b> | <b>Mean</b> |                   |                     |               |
| HRE WT                                    | 15       | 0.738175    | <b>Comparison</b> | <b>P value</b>      |               |
| HRE MUT                                   | 14       | 1.46448     |                   |                     | HRE WT vs MUT |

| <b>Figure EV4E: BNIP3 mRNA expression</b> |          |             |                   | <b>Test Results</b> |               |
|-------------------------------------------|----------|-------------|-------------------|---------------------|---------------|
| <b>LIMD1 promoter genotype</b>            | <b>N</b> | <b>Mean</b> |                   |                     |               |
| HRE WT                                    | 15       | 0.074807    | <b>Comparison</b> | <b>P value</b>      |               |
| HRE MUT                                   | 14       | 0.130271    |                   |                     | HRE WT vs MUT |

**Table S9 continued: Statistical analysis corresponding to Figure EV4**

| <b>Figure EV4F: PDGFB mRNA expression</b> |    |          |               |         |
|-------------------------------------------|----|----------|---------------|---------|
| LIMD1 promoter genotype                   | N  | Mean     | Test Results  |         |
|                                           |    |          | Comparison    | P value |
| HRE WT                                    | 15 | 1.507255 | HRE WT vs MUT | 0.032   |
| HRE MUT                                   | 14 | 2.175619 |               |         |

  

| <b>Figure EV4G: HIF-1<math>\alpha</math> mRNA expression</b> |    |          |               |         |
|--------------------------------------------------------------|----|----------|---------------|---------|
| LIMD1 promoter genotype                                      | N  | Mean     | Test Results  |         |
|                                                              |    |          | Comparison    | P value |
| HRE WT                                                       | 15 | 3.017813 | HRE WT vs MUT | 0.073   |
| HRE MUT                                                      | 14 | 5.352436 |               |         |

  

| <b>Figure EV4H: HIF-2<math>\alpha</math> mRNA expression</b> |    |          |               |         |
|--------------------------------------------------------------|----|----------|---------------|---------|
| LIMD1 promoter genotype                                      | N  | Mean     | Test Results  |         |
|                                                              |    |          | Comparison    | P value |
| HRE WT                                                       | 15 | 0.024033 | HRE WT vs MUT | 0.0042  |
| HRE MUT                                                      | 14 | 0.047921 |               |         |

  

| <b>Figure EV4I: ENO1 mRNA expression</b> |    |          |               |         |
|------------------------------------------|----|----------|---------------|---------|
| LIMD1 promoter genotype                  | N  | Mean     | Test Results  |         |
|                                          |    |          | Comparison    | P value |
| HRE WT                                   | 15 | 5.247372 | HRE WT vs MUT | 0.0013  |
| HRE MUT                                  | 14 | 10.23965 |               |         |

  

| <b>Figure EV4J: EDN1</b> |    |          |               |         |
|--------------------------|----|----------|---------------|---------|
| LIMD1 promoter genotype  | N  | Mean     | Test Results  |         |
|                          |    |          | Comparison    | P value |
| HRE WT                   | 15 | 3.0722   | HRE WT vs MUT | 0.0047  |
| HRE MUT                  | 14 | 5.531214 |               |         |

  

| <b>Figure EV4K: ALDOC mRNA expression</b> |    |          |               |         |
|-------------------------------------------|----|----------|---------------|---------|
| LIMD1 promoter genotype                   | N  | Mean     | Test Results  |         |
|                                           |    |          | Comparison    | P value |
| HRE WT                                    | 15 | 0.088881 | HRE WT vs MUT | 0.07    |
| HRE MUT                                   | 14 | 0.128143 |               |         |

  

| <b>Figure EV4L: SOD2 mRNA expression</b> |    |          |               |         |
|------------------------------------------|----|----------|---------------|---------|
| LIMD1 promoter genotype                  | N  | Mean     | Test Results  |         |
|                                          |    |          | Comparison    | P value |
| HRE WT                                   | 15 | 1.1048   | HRE WT vs MUT | 0.061   |
| HRE MUT                                  | 14 | 1.793857 |               |         |

  

| <b>Figure EV4M: KITLG mRNA expression</b> |    |          |               |         |
|-------------------------------------------|----|----------|---------------|---------|
| LIMD1 promoter genotype                   | N  | Mean     | Test Results  |         |
|                                           |    |          | Comparison    | P value |
| HRE WT                                    | 15 | 3.615933 | HRE WT vs MUT | 0.00066 |
| HRE MUT                                   | 14 | 6.701643 |               |         |

  

| <b>Figure EV4N: SLC2A1 mRNA expression</b> |    |          |               |         |
|--------------------------------------------|----|----------|---------------|---------|
| LIMD1 promoter genotype                    | N  | Mean     | Test Results  |         |
|                                            |    |          | Comparison    | P value |
| HRE WT                                     | 15 | 11.15864 | HRE WT vs MUT | 0.0012  |
| HRE MUT                                    | 14 | 21.58199 |               |         |

  

| <b>Figure EV4O: SLC2A14</b> |    |          |               |         |
|-----------------------------|----|----------|---------------|---------|
| LIMD1 promoter genotype     | N  | Mean     | Test Results  |         |
|                             |    |          | Comparison    | P value |
| HRE WT                      | 15 | 5.468563 | HRE WT vs MUT | 0.036   |
| HRE MUT                     | 14 | 7.396154 |               |         |

**Table S10: Primers****LIMD1 promoter HRE mutagenesis primers**

|              |                | Sequence                                              |
|--------------|----------------|-------------------------------------------------------|
| <b>ΔHRE1</b> | <b>Forward</b> | CCTCTACGAATAACGAGCCTACTAGGGTGTATGCTTTTACTGCTGCACTGAGG |
|              | <b>Reverse</b> | CCTCAGTGCAGCAGTAAAAGCATAACCCCTAGTAGGCTCGTTATTCGTAGAGG |
| <b>ΔHRE2</b> | <b>Forward</b> | GCTTTTACTGCTGCACTGAGGATACAAAATGCGCGCAGGCACAACGAGAC    |
|              | <b>Reverse</b> | GTCTCGTTGTGCCTGCGCGCATTTTGTATCCTCAGTGCAGCAGTAAAAGC    |
| <b>ΔHRE2</b> | <b>Forward</b> | CGCCCCGGCGCGGGCTCGGGATACACAGAGCCGGCGAGCGAGCAGC        |
|              | <b>Reverse</b> | GCTGCTCGCTCGCCGGCTCTGTGTATCCCAGCCCCGCGCCGGGGCG        |

**shHIF plasmids**

|                  |                | Sequence                                                       |
|------------------|----------------|----------------------------------------------------------------|
| <b>shControl</b> | <b>Forward</b> | GTACCTCCCTACATCCCGATCGATGATCAAGAGTCATCGATCGGGATGTAGGTTTTGGAAA  |
|                  | <b>Reverse</b> | AGCTTTTCCAAAAACCTACATCCCGATCGATGACTCTTGATCATCGATCGGGATGTAGGGAG |
| <b>shHIF1α</b>   | <b>Forward</b> | GTACCTCCTGATGACCAGCAACTTGATCAAGAGTCAAGTTGCTGGTCATCAGTTTTGGAAA  |
|                  | <b>Reverse</b> | AGCTTTTCCAAAAACTGATGACCAGCAACTTGACTCTTGATCAAGTTGCTGGTCATCAGGAG |
| <b>shHIF2α</b>   | <b>Forward</b> | GTACCTCCAGCATCT TGGATAGCAGTTCAAGAGACTGCTATCAAAGATGCTTTTTGGAAA  |
|                  | <b>Reverse</b> | AGCTTT TCCAAAAACAGCATCTTTGATAGCAGTCTTTGAACTGCTATCAAAGATGCTGGAG |

**HIF UTR cloning primers**

|              |                | Sequence                         |
|--------------|----------------|----------------------------------|
| <b>HIF1α</b> | <b>Forward</b> | GACTCTCGAGGCTTTTTCTTAATTTTATTCC  |
|              | <b>Reverse</b> | AGTCGCGGCCGCGCCTGGTCCACAGAAGATG  |
| <b>HIF2α</b> | <b>Forward</b> | GACTCTCGAGGCCAGGCCTTCTACCTGGGC   |
|              | <b>Reverse</b> | AGTCGCGGCCGCCAGTGGTAGGATCAGAATAC |

**EMSA primers**

|                                    |                | Sequence                   |
|------------------------------------|----------------|----------------------------|
| <b>LIMD1 wild type HRE (LIMD1)</b> | <b>Forward</b> | GGGCTCGGGACGTGCAGAGCCGGC   |
|                                    | <b>Reverse</b> | GCCGGCTCTGCACGTCCCGAGCCC   |
| <b>LIMD1 mutant HRE (mLIMD1)</b>   | <b>Forward</b> | GGGCTCGGGAataatAGAGCCGGC   |
|                                    | <b>Reverse</b> | GCCGGCTCTattatTCCCGAGCCC   |
| <b>PHD2 wild type HRE (LIMD1)</b>  | <b>Forward</b> | GCCGTGGTGTACGTGCAGAGCGCG   |
|                                    | <b>Reverse</b> | CGCGCTCTGCACGTACACCACGGC   |
| <b>PHD2 mutant HRE (mLIMD1)</b>    | <b>Forward</b> | GCCGTGGTGTATAataatAGAGCGCG |
|                                    | <b>Reverse</b> | CGCGCTCTattatTACACCACGGC   |

**ChIP primers**

|              |                | Sequence                 |
|--------------|----------------|--------------------------|
| <b>LIMD1</b> | <b>Forward</b> | CAGGCCTGGGGGCAGGAG       |
|              | <b>Reverse</b> | GGGACGCGGAAGTGAGTG       |
| <b>PHD2</b>  | <b>Forward</b> | CGGGTCGCCGCGGGGCCGTGG    |
|              | <b>Reverse</b> | GGAGGAGCGCAGGGCATACGGGCG |
| <b>PHD3</b>  | <b>Forward</b> | CGTGGAGGACTGGCTCTAAG     |
|              | <b>Reverse</b> | GGTGTGCTCGGGTGTG         |

**Table S10 continued: Primers**

**qRT-PCR primers**

| Gene symbol          | Gene name                                       | 5'-3' Primer Sequences   |                           |
|----------------------|-------------------------------------------------|--------------------------|---------------------------|
|                      |                                                 | Forward                  | Reverse                   |
| ALDOA                | Aldolase A                                      | GCAAACGTTCTTGACGCTA      | TACCTGGTGGAGCAGCTGTG      |
| ALDOC                | Aldolase C, fructose-bisphosphate               | TAACTGGCTGCGCACAGGGAGC   | ATCCGCAGGGCAATGTACAGACAA  |
| BNIP3                | BCL2/adenovirus E1B 19kDa interacting protein 3 | ATGTCGTCCACCTAGTCGAG     | CTCCACCCAGGAAGTGTGAG      |
| EDN1                 | Endothelin 1                                    | CAAGCAGGAAAAGAACTCAG     | CTGGTTTGTCTTAGGTGTTT      |
| mEMCN                | Endomucin (mouse)                               | GCTATTCACATTCACACACC     | TAAAACACCTGTGCTGTTAC      |
| ENO1                 | Enolase 1                                       | AGCGGAGCGGTGTTCAAGAT     | CAGCCAGAGATACGCCAAAGAT    |
| ERO1L                | Endoplasmic reticulum oxidoreductin-1-like      | AGCTGATGACATTCAGTCCCCTGA | GGTCCCTTGTAACCAAGTGTAGCGC |
| GAPDH                | Glyceraldehyde 3-phosphate dehydrogenase        | ACATGTGTAAGCTGCGGCC      | GTTGTGCATAGTCGCTGCTTG     |
| HIF1A                | Hypoxia-inducible factor 1, alpha               | CCAGTTACGTTCTTCGATCAGT   | TTTGAGGACTTGCGCTTTCA      |
| HIF2A                | Hypoxia-inducible factor 2, alpha               | GTGCTCCCACGGCCTGTA       | TTGTCACACCTATGGCATATCACA  |
| HK1                  | Hexokinase 1                                    | AACCAAGGCTGAGCCGAGCT     | AGCCAGAGAGCCAGGCACT       |
| KITLG                | KIT ligand                                      | AGTGATTGTGTGGTTTCTTC     | TCCTATTACTGCTACTGCTG      |
| LDHA                 | Lactate dehydrogenase A                         | AGCCGATTCGGTTACCT        | CACCAGCAACATTCATTCCA      |
| LIMD1                | LIM domain-containing protein 1                 | TGGGGAACCTCTACCATGAC     | CACAAAACACTTTGCCGTTG      |
| PDGFB                | Platelet derived growth factor B                | GGGCAGGTTATTTAATATGG     | AATCAGGCATCGAGACAG        |
| PGM2                 | Phosphoglucomutase 2                            | CCTCTTTCTGATATAACGCCAAC  | CCCTTTATCGTGAGGAGAAATG    |
| PHD2                 | Prolyl hydroxylase domain protein 2             | CGGCTGCGAAACCATTGGGC     | CCATGGCTTTGTCGGCCAT       |
| SLC2A1               | Solute carrier family 2 member 1                | ACCTCAAATTTTATTGTGGG     | GAAGATGAAGAACAGAACCCAG    |
| SLC2A14              | Solute carrier family 2 member 14               | CTGTGTTCTATTACTCAACAGG   | GATAGATTAACCCACACCCG      |
| SOD2                 | Superoxide dismutase 2                          | ATTTTCTGGACAAACCTCAG     | TTCTTATTGAAACCAAGCC       |
| VEGFA                | Vascular endothelial growth factor A            | CACCAAGGCCAGCAGATAGGAG   | GCCACAGGGATTTTCTGTCTTGC   |
| VEGFB                | Vascular endothelial growth factor B            | GAAAGTGGTGTGATGGATAG     | ATGAGCTCCACAGTCAAG        |
| VEGFC                | Vascular endothelial growth factor C            | CTGGCTCAGGAAGATTTATG     | TGTTTTTACAGACACTGG        |
| <b>House Keeping</b> |                                                 |                          |                           |
| BTUB                 | Beta Tubulin                                    | ATACCTTGAGGCGAGCAAAA     | CTGATCACCTCCAGAACTTG      |
| RNPII                | RNA Polymerase II                               | GACACAGGACCACTCATGAAGT   | GTGCGGCTGCTCCATAAG        |

**Table S11: Antibodies**

|             |                                      |
|-------------|--------------------------------------|
| <b>Key</b>  |                                      |
| <b>IB</b>   | Immunoblotting                       |
| <b>IP</b>   | Immunoprecipitation                  |
| <b>IHC</b>  | Immunohistochemistry                 |
| <b>EMSA</b> | Electrophoretic mobility shift assay |
| <b>ChIP</b> | Chromosome immunoprecipitation       |

| <b>Antibody</b>       | <b>Supplier</b>          | <b>Cat #</b> | <b>Application</b>  |
|-----------------------|--------------------------|--------------|---------------------|
| anti-LIMD1            | Cell Signaling           | #13245       | <b>IB/IP/IHC</b>    |
| anti-HIF1 $\alpha$    | BD Biosciences           | #610959      | <b>IB/EMSA/ChIP</b> |
| anti-HIF2 $\alpha$    | Novus Biologicals        | #NB100-122   | <b>IB/EMSA</b>      |
| anti-PHD2             | Abcam                    | #ab4561      | <b>IB</b>           |
| anti- $\beta$ -actin  | Sigma                    | #A1978       | <b>IB</b>           |
| anti-VHL              | BD Biosciences           | #556347      | <b>IB</b>           |
| anti-HIF1 $\beta$     | Cell Signaling           | #3718        | <b>IB</b>           |
| anti-Flag             | Cell Signaling           | #2368        | <b>IB</b>           |
| anti-p53              | Santa Cruz Biotechnology | #sc-126      | <b>IB</b>           |
| HRP- goat anti-mouse  | Dako                     | P0447        | <b>IB</b>           |
| HRP- goat anti-rabbit | Dako                     | P0448        | <b>IB</b>           |
| anti-VEGFA            | Abcam                    | ab27620      | <b>IHC</b>          |
