# Supplementary material for: A HIF–LIMD1 negative feedback mechanism mitigates the pro‐tumorigenic effects of hypoxia
Source: PubMed Central journal article supplement (PMC6079541; doi:10.15252/emmm.201708304), 2018-06-21

# Source data: Figure 4

## Figure 4A

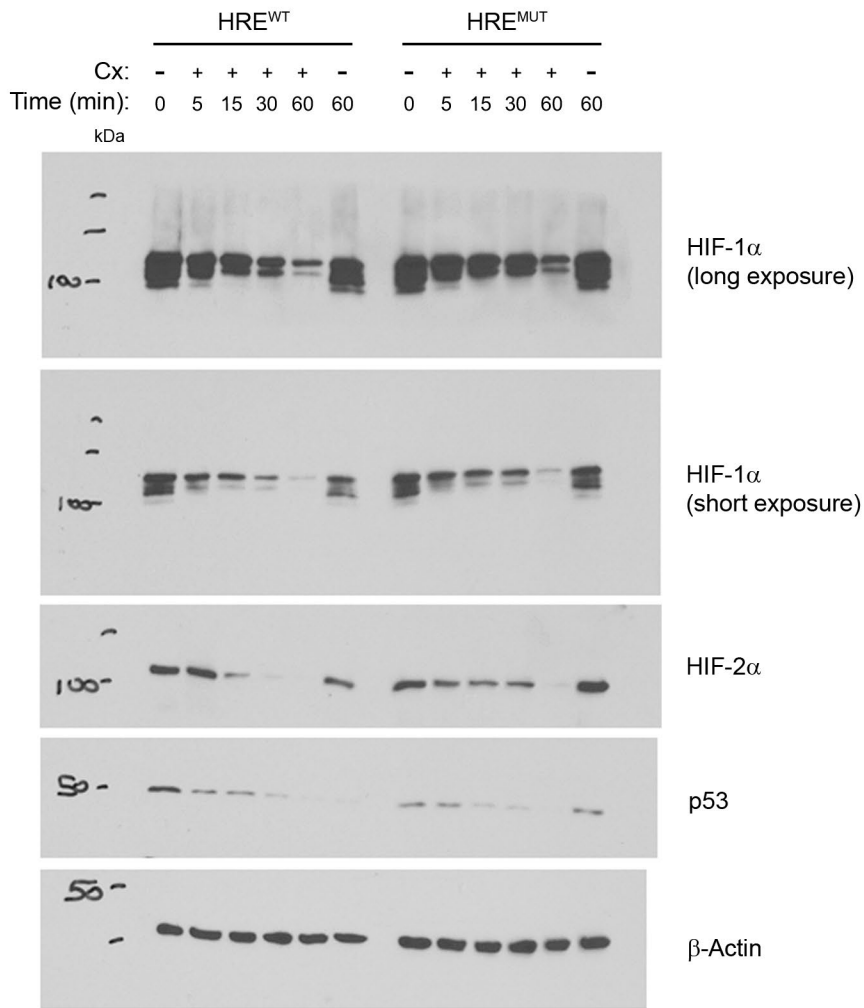

## Figure 4C

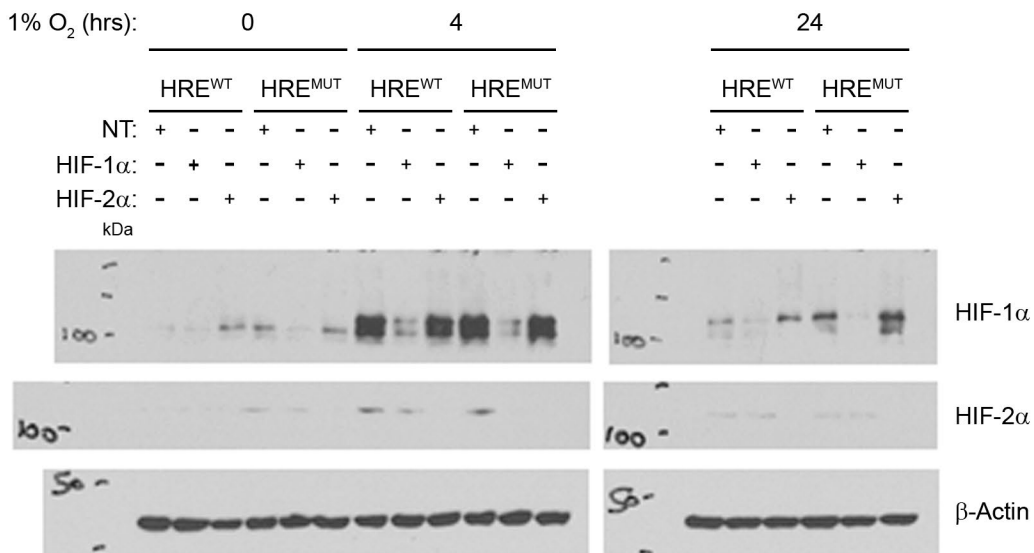

Supplement: EMMM-10-e8304-s007.pdf [file EMMM-10-e8304-s007.pdf]
