# Supplementary material for: A HIF–LIMD1 negative feedback mechanism mitigates the pro‐tumorigenic effects of hypoxia
Source: PubMed Central journal article supplement (PMC6079541; doi:10.15252/emmm.201708304), 2018-06-21

Source data: Figure 5

Figure 5E

HRE<sup>WT</sup>

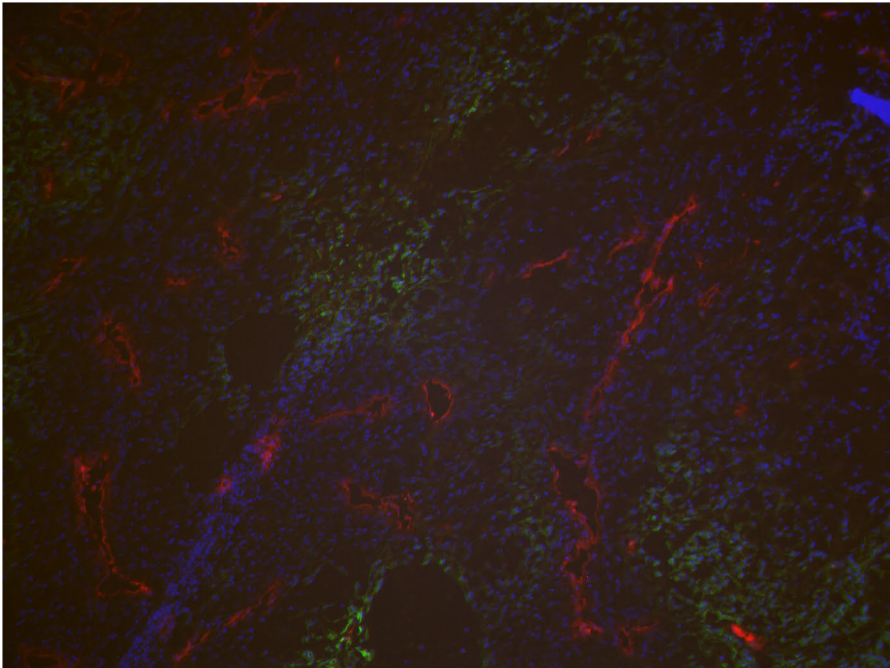

HRE<sup>MUT</sup>

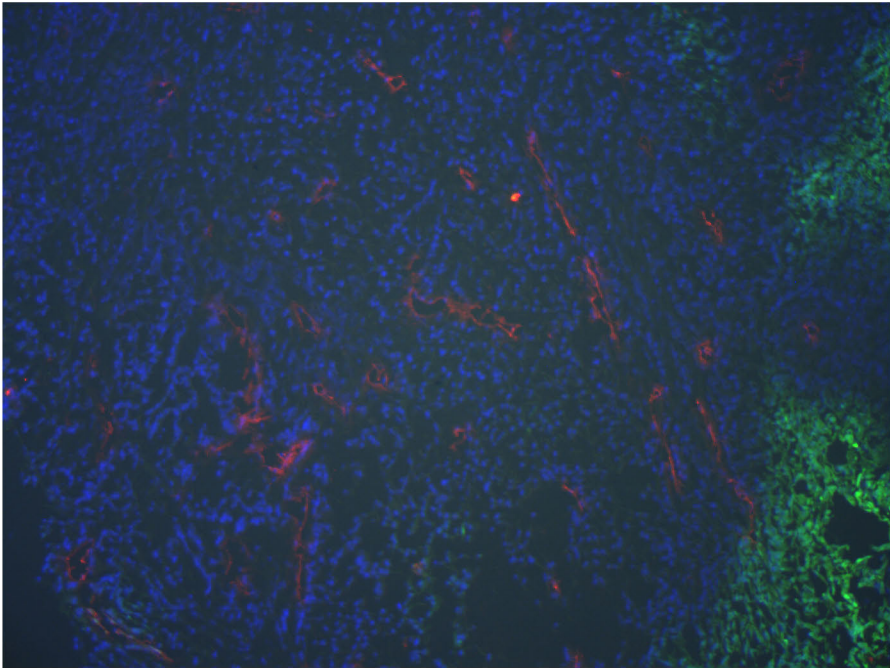

Supplement: EMMM-10-e8304-s008.pdf [file EMMM-10-e8304-s008.pdf]
